# Supplementary material for: Deciphering the mechanism of copper-catalyzed N-arylation between aryl halides and nitriles: a DFT study
Source: Royal Society of Chemistry journal article supplement (doi:10.1039/c9nj03860d), 2019-01-01
Supplement: c9nj03860d1.pdf [file c9nj03860d1.pdf]

## Supporting Information For

### Deciphering the Mechanism of Copper Catalyzed N-arylation between Aryl halides and Nitriles: A DFT Study

Khalil Ahmad<sup>a,\*</sup>, Bilal Ahmad Khan<sup>b</sup>, Tashfeen Akhtar<sup>a</sup>, Jahanzeb Khan<sup>c</sup> and Soumendra K. Roy<sup>d,\*</sup>

<sup>a</sup>*Department of Chemistry, Mirpur University of Science and Technology (MUST), Mirpur 10250, (AJK) Pakistan.*

<sup>b</sup>*Department of Chemistry, University of Azad Jammu and Kashmir, Muzaffarabad 13100, Pakistan*

<sup>c</sup>*Department of Chemistry and Key Laboratory of Organic Optoelectronics and Molecular Engineering of Ministry of Education, Tsinghua University, Beijing 100084, P. R. China.*

<sup>d</sup>*Institute of Theoretical and Computational Chemistry, Shaanxi key Laboratory of Catalysis, School of Chemical and Environmental Science, Shaanxi University of Technology, Hanzhong, Shaanxi 723001, P. R. China.*

\* Corresponding authors.

E-mail address: [khalilahmad77@gmail.com](mailto:khalilahmad77@gmail.com) (K.A.); [soumya029@yahoo.in](mailto:soumya029@yahoo.in) (S.R.K.)

#### Contents

|                                                                         |    |
|-------------------------------------------------------------------------|----|
| 1. Test of DFT methods -----                                            | 02 |
| 2. Effect of solvent coordination on the activation energy barrier----- | 03 |
| 3. Cartesian coordinates of relevant stationary points -----            | 03 |
| 4. Full citation for reference 15 -----                                 | 43 |

## 1. Test of DFT Methods

The reliability of B3LYP method was tested by,

- 1) Optimizing the geometries with the B3PW91 method. The optimized geometries were subjected to single point energy calculations in solution with the B3LYP method. The calculated activation energies were compared with the activation energies obtained by geometry optimizations and single point energy calculations with the B3LYP method (Table S1).

**Table S1.** Activation energies calculated by optimization with B3LYP/SP with B3LYP (B3LYP/B3LYP) and geometry optimization with B3PW91/SP with B3LYP (B3PW91/B3LYP).

| Transition State | Activation Energy (kcal/mol) |              | Transition State | Activation Energy (kcal/mol) |              |
|------------------|------------------------------|--------------|------------------|------------------------------|--------------|
|                  | B3LYP/B3LYP                  | B3PW91/B3LYP |                  | B3LYP/B3LYP                  | B3PW91/B3LYP |
| Int1TS1          | 25.9                         | 27.0         | Int1TS2          | 24.8                         | 24.8         |
| Int1TS2-1        | 4.6                          | 2.7          | Int1TS2-2        | 1.2                          | 5.9          |
| Int2TS1          | 27.5                         | 29.7         | Int2TS2          | 23.8                         | 23.7         |
| Int1TS3          | 22.9                         | 22.8         | Int1TS4          | 6.9                          | 7.0          |

- 2) The single point energy calculations in solution were repeated with the B3PW91, wB97XD and PBEh1PBE methods and the obtained activation energies were compared with the B3LYP method (Table S2).

**Table S2.** Activation energies of the important transition states calculated by four different DFT methods.

| Transition State | Activation Energy (kcal/mol) |        |          |        |
|------------------|------------------------------|--------|----------|--------|
|                  | B3LYP                        | wB97XD | PBEh1PBE | B3PW91 |
| Int1TS1          | 25.9                         | 18.2   | 18.5     | 22.2   |
| Int1TS2          | 24.8                         | 24.8   | 23.6     | 23.2   |
| Int1TS2-1        | 4.6                          | 0.0    | 0.0      | 2.4    |
| Int1TS2-2        | 1.2                          | 0.0    | 0.0      | 0.0    |
| Int1TS3          | 22.9                         | 10.0   | 15.8     | 20.1   |
| Int1TS4          | 6.9                          | 4.4    | 6.1      | 6.3    |

## 2. Effect of solvent coordination on the activation energy barrier

The effect of potential coordination of H<sub>2</sub>O molecules for the key intermediates and transition states was evaluated by optimizing the geometries with an added H<sub>2</sub>O molecule in gas phase and calculating the single point energies in the solution. A comparison of activation energies of H<sub>2</sub>O-coordinated geometries with the activation energies of geometries without H<sub>2</sub>O is depicted in Fig. S1.

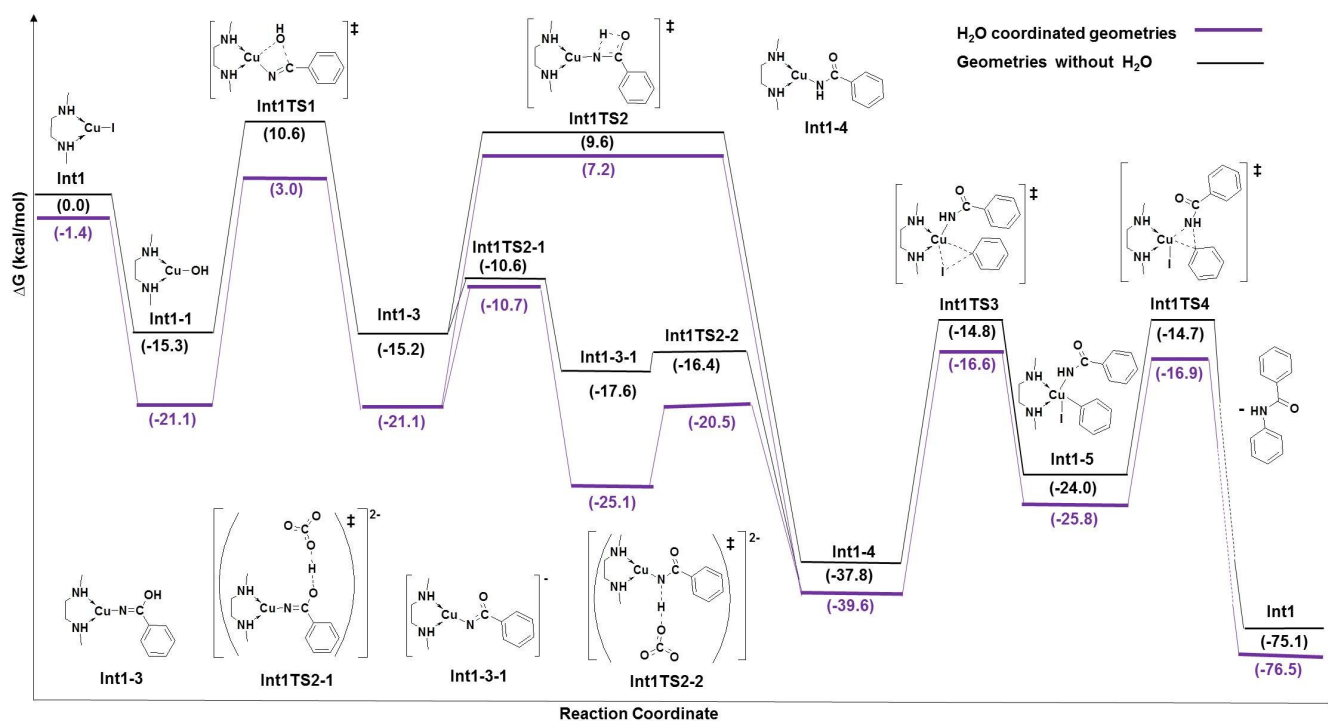

**Fig. S1.** Energy profile for the hydrolysis and C-N coupling reaction of benzonitrile.

## 3. Cartesian coordinates of relevant stationary points

### Int1

Charge 0

Spin multiplicity 1

Atomic Coordinates (Angstroms)

| Type | X | Y | Z |
|------|---|---|---|
|------|---|---|---|

|    |            |             |             |
|----|------------|-------------|-------------|
| Cu | 0.23016200 | -0.08591400 | -0.02397400 |
| C  | 3.11216900 | -0.62483300 | 0.19850000  |
| C  | 3.04299500 | 0.86711700  | -0.13443200 |
| H  | 4.06226000 | -1.04719400 | -0.16468500 |
| H  | 3.09277300 | -0.76542200 | 1.28652800  |

|                                              |             |             |             |
|----------------------------------------------|-------------|-------------|-------------|
| H                                            | 3.93289500  | 1.37934900  | 0.26554500  |
| H                                            | 3.05827700  | 1.00384600  | -1.22334700 |
| N                                            | 1.94117500  | -1.32926300 | -0.35663200 |
| N                                            | 1.78380500  | 1.44047500  | 0.36294900  |
| C                                            | 1.50298900  | 2.79542700  | -0.13916500 |
| H                                            | 1.36889000  | 2.75465300  | -1.22391100 |
| H                                            | 0.56801300  | 3.14775500  | 0.30213800  |
| H                                            | 2.30855900  | 3.51034500  | 0.09036900  |
| C                                            | 1.82654600  | -2.72599300 | 0.10419300  |
| H                                            | 1.64184300  | -2.73404500 | 1.18182000  |
| H                                            | 0.97196900  | -3.19326000 | -0.38957000 |
| H                                            | 2.73444200  | -3.31269700 | -0.10392300 |
| H                                            | 2.02171100  | -1.33665500 | -1.37415200 |
| I                                            | -2.21196200 | -0.01957100 | 0.00844600  |
| H                                            | 1.81460700  | 1.47328800  | 1.38203600  |
| Sum of electronic and zero-point Energies=   |             |             | -477.808492 |
| Sum of electronic and thermal Energies=      |             |             | -477.796869 |
| Sum of electronic and thermal Enthalpies=    |             |             | -477.795925 |
| Sum of electronic and thermal Free Energies= |             |             | -477.849871 |

---

## Int2

Charge -1

Spin multiplicity 1

Atomic Coordinates (Angstroms)

| Type                                       | X           | Y           | Z           |
|--------------------------------------------|-------------|-------------|-------------|
| Cu                                         | 0.22789500  | -0.54843600 | -0.08528600 |
| C                                          | 2.90414400  | 1.08975700  | -0.23987800 |
| C                                          | 3.08112700  | -0.36672000 | 0.19706500  |
| H                                          | 3.80484100  | 1.67320000  | 0.05151200  |
| H                                          | 2.83256100  | 1.12472400  | -1.33546400 |
| H                                          | 4.05551200  | -0.70895500 | -0.22312900 |
| H                                          | 3.25092600  | -0.36478200 | 1.30960100  |
| N                                          | 1.67606600  | 1.66117600  | 0.29812800  |
| N                                          | 2.00504800  | -1.21361400 | -0.22251800 |
| C                                          | 2.29869700  | -2.59031700 | 0.08330000  |
| H                                          | 2.42947700  | -2.80584000 | 1.17259200  |
| H                                          | 1.49483200  | -3.24391500 | -0.27555900 |
| H                                          | 3.24261100  | -2.93801300 | -0.39865100 |
| C                                          | 1.43566900  | 3.04500300  | -0.06156900 |
| H                                          | 1.31340500  | 3.11857800  | -1.14910300 |
| H                                          | 0.50138100  | 3.38394200  | 0.39856200  |
| H                                          | 2.24813100  | 3.74468800  | 0.22956800  |
| H                                          | 1.65529800  | 1.54441700  | 1.30910500  |
| I                                          | -2.21742500 | 0.02221400  | 0.01851900  |
| Sum of electronic and zero-point Energies= |             |             | -477.253074 |

Sum of electronic and thermal Energies= -477.241423  
 Sum of electronic and thermal Enthalpies= -477.240479  
 Sum of electronic and thermal Free Energies= -477.294341

---

**Int1-1**

Charge 0

Spin multiplicity 1

Atomic Coordinates (Angstroms)  
 Type X Y Z

---

|    |             |             |             |
|----|-------------|-------------|-------------|
| Cu | 0.75963700  | 0.81688200  | 0.05458400  |
| C  | -1.60014700 | -1.42106900 | -0.03395900 |
| C  | -0.19236700 | -1.88136700 | -0.41514400 |
| H  | -2.32839400 | -2.04949300 | -0.58226700 |
| H  | -1.76786900 | -1.62304300 | 1.03406400  |
| H  | -0.10203000 | -2.96335100 | -0.23172500 |
| H  | -0.00927600 | -1.71481100 | -1.48291000 |
| N  | -1.76547500 | 0.00630400  | -0.24268300 |
| N  | 0.85946700  | -1.14412200 | 0.33308000  |
| C  | 2.20497600  | -1.70967800 | 0.07812900  |
| H  | 2.46730500  | -1.54920100 | -0.97014000 |
| H  | 2.93666900  | -1.19008900 | 0.69949800  |
| H  | 2.23872400  | -2.78807300 | 0.29414900  |
| C  | -2.99949900 | 0.57021600  | 0.29342000  |
| H  | -3.01079400 | 0.44685900  | 1.38234900  |
| H  | -3.01811000 | 1.64204700  | 0.07954200  |
| H  | -3.91907500 | 0.10953800  | -0.11094400 |
| H  | -1.67529000 | 0.23951600  | -1.22928000 |
| O  | 0.71671100  | 2.58846300  | -0.21619500 |
| H  | 1.62866400  | 2.91881000  | -0.23235500 |
| H  | 0.66059800  | -1.25987100 | 1.32917200  |

Sum of electronic and zero-point Energies= -542.160634

Sum of electronic and thermal Energies= -542.148925

Sum of electronic and thermal Enthalpies= -542.147981

Sum of electronic and thermal Free Energies= -542.199953

---

**Int1-2**

Charge 1

Spin multiplicity 1

Atomic Coordinates (Angstroms)  
 Type X Y Z

---

|   |             |             |             |
|---|-------------|-------------|-------------|
| C | -1.69683500 | -0.00000700 | -0.00000800 |
| N | -0.53365300 | -0.00000600 | -0.00001400 |
| C | -3.12082900 | -0.00000500 | -0.00000300 |
| C | -3.81712400 | 1.16638200  | 0.37384100  |

|                                              |             |             |             |
|----------------------------------------------|-------------|-------------|-------------|
| C                                            | -3.81713000 | -1.16639000 | -0.37384400 |
| C                                            | -5.20786900 | 1.15674900  | 0.37129900  |
| H                                            | -3.26867100 | 2.05807000  | 0.65960300  |
| C                                            | -5.20787500 | -1.15675100 | -0.37129500 |
| H                                            | -3.26868200 | -2.05808000 | -0.65960900 |
| C                                            | -5.90083900 | 0.00000000  | 0.00000400  |
| H                                            | -5.75250200 | 2.05060500  | 0.65817600  |
| H                                            | -5.75251300 | -2.05060600 | -0.65817000 |
| H                                            | -6.98670800 | 0.00000200  | 0.00000600  |
| Cu                                           | 1.33517500  | -0.00000500 | 0.00000200  |
| C                                            | 4.12075800  | 0.72812200  | -0.23031900 |
| C                                            | 4.12078000  | -0.72809700 | 0.23028100  |
| H                                            | 5.02930000  | 1.23660500  | 0.11984700  |
| H                                            | 4.12323300  | 0.77788900  | -1.32594500 |
| H                                            | 5.02931900  | -1.23656300 | -0.11991500 |
| H                                            | 4.12329300  | -0.77786500 | 1.32590700  |
| N                                            | 2.89161000  | 1.41133400  | 0.24219300  |
| N                                            | 2.89162700  | -1.41133200 | -0.24218700 |
| C                                            | 2.71114800  | -2.75084700 | 0.36685600  |
| H                                            | 2.53517000  | -2.63822300 | 1.43980000  |
| H                                            | 1.83899200  | -3.23281900 | -0.08025600 |
| H                                            | 3.59068000  | -3.39117100 | 0.21874400  |
| C                                            | 2.71109800  | 2.75085900  | -0.36681900 |
| H                                            | 2.53510200  | 2.63825400  | -1.43976200 |
| H                                            | 1.83894300  | 3.23280700  | 0.08032000  |
| H                                            | 3.59062200  | 3.39119400  | -0.21871000 |
| H                                            | 2.97778600  | 1.54288300  | 1.25189500  |
| H                                            | 2.97778300  | -1.54290000 | -1.25188900 |
| Sum of electronic and zero-point Energies=   |             |             | -790.588249 |
| Sum of electronic and thermal Energies=      |             |             | -790.571341 |
| Sum of electronic and thermal Enthalpies=    |             |             | -790.570396 |
| Sum of electronic and thermal Free Energies= |             |             | -790.636707 |

---

### Int1TS1

Charge 0

Spin multiplicity 1

| Atomic<br>Type | Coordinates (Angstroms) |   |   |
|----------------|-------------------------|---|---|
|                | X                       | Y | Z |

---

|   |            |             |             |
|---|------------|-------------|-------------|
| C | 1.24310400 | -0.32500300 | 0.11879800  |
| N | 0.38494200 | -0.75075300 | 0.85690700  |
| C | 2.70609000 | -0.14952600 | 0.09854100  |
| C | 3.44668300 | -0.79407800 | 1.10618900  |
| C | 3.38253400 | 0.63645500  | -0.84616500 |
| C | 4.83161300 | -0.66141800 | 1.15905600  |
| H | 2.91227100 | -1.39340600 | 1.83656700  |

|                                              |             |             |             |
|----------------------------------------------|-------------|-------------|-------------|
| C                                            | 4.77060800  | 0.77029300  | -0.78572700 |
| H                                            | 2.80450400  | 1.14370400  | -1.60920900 |
| C                                            | 5.49982100  | 0.12139400  | 0.21214800  |
| H                                            | 5.39249600  | -1.16857500 | 1.94018500  |
| H                                            | 5.28299900  | 1.38552600  | -1.52123900 |
| H                                            | 6.58115100  | 0.22484200  | 0.25426200  |
| Cu                                           | -1.20729400 | -0.22932100 | -0.59276900 |
| C                                            | -4.02208200 | -0.02563800 | 0.02313800  |
| C                                            | -3.37257100 | 0.66885700  | 1.22904900  |
| H                                            | -4.96874300 | -0.49838100 | 0.32880900  |
| H                                            | -4.25393500 | 0.72129400  | -0.74347200 |
| H                                            | -4.11501100 | 1.34089800  | 1.69201100  |
| H                                            | -3.10436800 | -0.08090900 | 1.98065500  |
| N                                            | -3.10526500 | -1.01839300 | -0.58745700 |
| N                                            | -2.15440500 | 1.36986800  | 0.82486900  |
| C                                            | -2.34096200 | 2.75666000  | 0.40173000  |
| H                                            | -1.36904300 | 3.18157100  | 0.13701400  |
| H                                            | -2.97075200 | 2.79279800  | -0.49378300 |
| H                                            | -2.81035600 | 3.38977400  | 1.17447500  |
| C                                            | -3.12583500 | -2.33059100 | 0.09572200  |
| H                                            | -2.50782600 | -3.03289200 | -0.46775100 |
| H                                            | -2.68941100 | -2.23389000 | 1.09183300  |
| H                                            | -4.14783600 | -2.73081700 | 0.18469000  |
| H                                            | 0.89268700  | -0.29758700 | -2.08122500 |
| O                                            | 0.61600500  | 0.31920400  | -1.38042500 |
| H                                            | -1.44395600 | 1.30644200  | 1.54776000  |
| H                                            | -3.39229700 | -1.16318700 | -1.55299100 |
| Sum of electronic and zero-point Energies=   |             |             | -866.525809 |
| Sum of electronic and thermal Energies=      |             |             | -866.507644 |
| Sum of electronic and thermal Enthalpies=    |             |             | -866.506700 |
| Sum of electronic and thermal Free Energies= |             |             | -866.574787 |

-----

### Int1-3

Charge 0

Spin multiplicity 1

| Atomic<br>Type | Coordinates (Angstroms) |   |   |
|----------------|-------------------------|---|---|
|                | X                       | Y | Z |

|   |            |             |             |
|---|------------|-------------|-------------|
| C | 1.60786900 | 0.94317600  | -1.09122400 |
| N | 0.36133900 | 0.84042800  | -1.20849800 |
| C | 2.57410300 | 0.18567500  | -0.22106100 |
| C | 2.11378000 | -0.75782600 | 0.70762900  |
| C | 3.95897000 | 0.40307000  | -0.31493600 |
| C | 3.00058900 | -1.46555000 | 1.51614000  |
| H | 1.04195700 | -0.92673600 | 0.78208900  |
| C | 4.84992200 | -0.30624600 | 0.49231500  |

|                                              |             |             |             |
|----------------------------------------------|-------------|-------------|-------------|
| H                                            | 4.33012800  | 1.13037500  | -1.02675200 |
| C                                            | 4.37652900  | -1.24331900 | 1.41194400  |
| H                                            | 2.61891700  | -2.19179500 | 2.23050900  |
| H                                            | 5.91823100  | -0.12447300 | 0.40144000  |
| H                                            | 5.07073600  | -1.79431400 | 2.04175000  |
| Cu                                           | -1.02665800 | -0.12874000 | -0.55036100 |
| C                                            | -3.84223200 | -0.57242100 | 0.07420400  |
| C                                            | -3.63223300 | 0.44255500  | 1.19819000  |
| H                                            | -4.66208800 | -1.25742300 | 0.34002000  |
| H                                            | -4.13251800 | -0.06083100 | -0.85121500 |
| H                                            | -4.59915300 | 0.93212800  | 1.41734600  |
| H                                            | -3.34071100 | -0.08770100 | 2.11583900  |
| N                                            | -2.59949400 | -1.33184800 | -0.21383400 |
| N                                            | -2.55950100 | 1.36741800  | 0.86385900  |
| C                                            | -2.10021500 | 2.20671400  | 1.96808300  |
| H                                            | -1.67791200 | 1.57074600  | 2.75374700  |
| H                                            | -1.30339900 | 2.86133300  | 1.60531200  |
| H                                            | -2.89462400 | 2.82708500  | 2.41876100  |
| C                                            | -2.80424200 | -2.33856200 | -1.28148200 |
| H                                            | -3.01064100 | -1.82416100 | -2.22304700 |
| H                                            | -1.89003000 | -2.92272500 | -1.40266300 |
| H                                            | -3.64323600 | -3.01154500 | -1.05028400 |
| H                                            | -2.34527300 | -1.83609800 | 0.63793600  |
| H                                            | 1.60603000  | 2.29849400  | -2.37847200 |
| O                                            | 2.31037500  | 1.88530500  | -1.84717000 |
| H                                            | -2.82977200 | 1.95307200  | 0.07600800  |
| Sum of electronic and zero-point Energies=   |             |             | -866.556344 |
| Sum of electronic and thermal Energies=      |             |             | -866.538164 |
| Sum of electronic and thermal Enthalpies=    |             |             | -866.537220 |
| Sum of electronic and thermal Free Energies= |             |             | -866.607416 |

---

### Int1TS2

Charge 0

Spin multiplicity 1

| Atomic | Coordinates (Angstroms) |   |   |
|--------|-------------------------|---|---|
| Type   | X                       | Y | Z |

---

|   |             |             |             |
|---|-------------|-------------|-------------|
| C | -1.57591400 | -1.40172000 | -0.34345900 |
| N | -0.28224900 | -1.25716000 | -0.32048200 |
| C | -2.67263900 | -0.44878400 | -0.03371100 |
| C | -2.42719100 | 0.81366700  | 0.52455500  |
| C | -3.99748000 | -0.82549000 | -0.30271000 |
| C | -3.48001500 | 1.68426100  | 0.80133100  |
| H | -1.40111300 | 1.09652300  | 0.74320200  |
| C | -5.05089500 | 0.04730300  | -0.03018000 |
| H | -4.17847200 | -1.80740900 | -0.72585300 |



|                                                         |             |             |             |
|---------------------------------------------------------|-------------|-------------|-------------|
| C                                                       | -4.79594500 | 1.30460000  | 0.52195100  |
| H                                                       | -3.27652900 | 2.65904200  | 1.23843100  |
| H                                                       | -6.07240200 | -0.25532600 | -0.24639100 |
| H                                                       | -5.61716500 | 1.98374400  | 0.73727000  |
| Cu                                                      | 0.97770900  | 0.05208300  | -0.10101700 |
| C                                                       | 3.61252300  | 1.25798900  | -0.41666500 |
| C                                                       | 4.11915600  | 0.03095800  | 0.34261300  |
| H                                                       | 4.29780600  | 2.10487400  | -0.25910100 |
| H                                                       | 3.58741900  | 1.05460000  | -1.49377900 |
| H                                                       | 5.17327700  | -0.14925500 | 0.06309600  |
| H                                                       | 4.11861300  | 0.24548000  | 1.42049800  |
| N                                                       | 2.23194400  | 1.61971300  | -0.00586600 |
| N                                                       | 3.24051800  | -1.10809000 | 0.11906800  |
| C                                                       | 3.44663600  | -2.23845000 | 1.02246400  |
| H                                                       | 3.23369900  | -1.92192400 | 2.04931000  |
| H                                                       | 2.73696200  | -3.02870800 | 0.76466800  |
| H                                                       | 4.46963700  | -2.65205800 | 0.99480300  |
| C                                                       | 1.73885100  | 2.81524900  | -0.72946000 |
| H                                                       | 1.63099400  | 2.57222000  | -1.78915400 |
| H                                                       | 0.75736900  | 3.09188900  | -0.33999000 |
| H                                                       | 2.42779600  | 3.66655400  | -0.62593800 |
| H                                                       | 2.26217800  | 1.85396100  | 0.98868900  |
| H                                                       | -0.60568200 | -2.55998700 | -0.71654900 |
| O                                                       | -1.88032000 | -2.63263700 | -0.71451800 |
| H                                                       | 3.31061900  | -1.42228100 | -0.84697800 |
| Sum of electronic and zero-point Energies= -866.521500  |             |             |             |
| Sum of electronic and thermal Energies= -866.503553     |             |             |             |
| Sum of electronic and thermal Enthalpies= -866.502608   |             |             |             |
| Sum of electronic and thermal Free Energies=-866.571820 |             |             |             |

---

### Int1TS2-1

Charge -2

Spin multiplicity 1

Atomic Coordinates (Angstroms)

| Atomic Type | X          | Y           | Z           |
|-------------|------------|-------------|-------------|
| C           | 1.90524700 | -0.24113500 | 0.04742700  |
| N           | 1.15526200 | 0.51217500  | 0.76454900  |
| C           | 3.39969800 | 0.06880000  | 0.00594500  |
| C           | 3.92012400 | 1.16409700  | 0.71754600  |
| C           | 4.30309000 | -0.72178100 | -0.72683900 |
| C           | 5.28147100 | 1.46135100  | 0.69877300  |
| H           | 3.19734900 | 1.75393000  | 1.27624300  |
| C           | 5.67053200 | -0.42923400 | -0.74624100 |
| H           | 3.89420500 | -1.56432300 | -1.27460900 |
| C           | 6.17243100 | 0.66424100  | -0.03475300 |

|    |             |             |             |
|----|-------------|-------------|-------------|
| H  | 5.65832800  | 2.31928700  | 1.25835800  |
| H  | 6.35116100  | -1.05856100 | -1.32245800 |
| H  | 7.23846700  | 0.89387400  | -0.04984300 |
| Cu | -0.68615600 | 0.17363300  | 0.70917800  |
| C  | -3.80523100 | 0.16799200  | 0.78331700  |
| C  | -3.75404200 | 1.60083500  | 0.21812000  |
| H  | -4.70269100 | 0.03557000  | 1.41982100  |
| H  | -3.84883800 | -0.55795100 | -0.03926000 |
| H  | -4.68196800 | 2.14639100  | 0.47429700  |
| H  | -2.92988900 | 2.14931300  | 0.72678200  |
| N  | -2.59578500 | -0.17686500 | 1.56823700  |
| N  | -3.59286700 | 1.57750700  | -1.22723900 |
| C  | -3.17346400 | 2.85625100  | -1.75671100 |
| H  | -2.26569400 | 3.27595500  | -1.27268500 |
| H  | -2.95930100 | 2.75671500  | -2.82832900 |
| H  | -3.97389400 | 3.61108500  | -1.64689200 |
| C  | -2.66064800 | -1.57697400 | 2.03132000  |
| H  | -2.70749100 | -2.21679200 | 1.14459000  |
| H  | -1.75667500 | -1.80934900 | 2.60083600  |
| H  | -3.55241200 | -1.75870500 | 2.66581700  |
| H  | -2.54821800 | 0.43390700  | 2.38306100  |
| H  | 0.51897400  | -1.65865400 | -0.77319100 |
| O  | 1.63441400  | -1.31068300 | -0.71071000 |
| H  | -2.87084900 | 0.84813900  | -1.43084100 |
| C  | -1.67537000 | -1.59639900 | -1.12922400 |
| O  | -1.52703900 | -0.30107900 | -1.30439000 |
| O  | -0.59464900 | -2.30118800 | -0.85948200 |
| O  | -2.81664400 | -2.15369500 | -1.15901400 |

-----

### Int1-3-1

Charge -1

Spin multiplicity 1

| Atomic | Coordinates (Angstroms) |   |   |
|--------|-------------------------|---|---|
| Type   | X                       | Y | Z |

-----

|   |            |             |             |
|---|------------|-------------|-------------|
| C | 1.08523800 | -0.20331800 | 0.17335100  |
| N | 0.53617600 | -1.35666300 | -0.11745200 |
| C | 2.61441400 | -0.14126400 | 0.06349200  |
| C | 3.37642900 | -1.26054700 | -0.30692900 |
| C | 3.29112800 | 1.05682600  | 0.33677700  |
| C | 4.76643400 | -1.18543800 | -0.40123900 |
| H | 2.83378100 | -2.17791100 | -0.51507100 |
| C | 4.68301400 | 1.13797400  | 0.24382900  |
| H | 2.68416600 | 1.91058800  | 0.62127400  |
| C | 5.43020500 | 0.01634600  | -0.12590700 |
| H | 5.33953400 | -2.06638500 | -0.69077100 |

|    |             |             |             |
|----|-------------|-------------|-------------|
| H  | 5.18868500  | 2.07921600  | 0.46040000  |
| H  | 6.51558900  | 0.07597000  | -0.19900600 |
| Cu | -1.27044000 | -1.15983500 | 0.06845300  |
| C  | -3.75986700 | 0.41681700  | -0.35526200 |
| C  | -3.09559300 | 1.72136500  | 0.10389400  |
| H  | -4.84508600 | 0.48004600  | -0.15606600 |
| H  | -3.61753200 | 0.30605200  | -1.43448200 |
| H  | -3.79476400 | 2.52806300  | -0.17005500 |
| H  | -3.06257400 | 1.72888400  | 1.21900700  |
| N  | -3.23429200 | -0.80851300 | 0.30327800  |
| N  | -1.82412100 | 1.99980000  | -0.52443200 |
| C  | -1.37340800 | 3.36003600  | -0.27143100 |
| H  | -1.38555700 | 3.64912200  | 0.79945200  |
| H  | -0.34040000 | 3.44542000  | -0.61802000 |
| H  | -1.99520200 | 4.08837600  | -0.81688100 |
| C  | -4.05925200 | -1.98984300 | -0.01531900 |
| H  | -3.96159000 | -2.21505400 | -1.08060300 |
| H  | -3.69256900 | -2.84915400 | 0.55126900  |
| H  | -5.12548900 | -1.82300900 | 0.21394200  |
| H  | -3.27932800 | -0.65260700 | 1.31262400  |
| O  | 0.54346300  | 0.91616800  | 0.54802700  |
| H  | -1.06338800 | 1.38217000  | -0.16764900 |

-----

**Int1TS2-2**

Charge -2

Spin multiplicity 1

| Atomic Type | Coordinates (Angstroms) |   |   |
|-------------|-------------------------|---|---|
|             | X                       | Y | Z |

-----

|    |             |             |             |
|----|-------------|-------------|-------------|
| C  | 1.93721300  | 1.53267300  | 0.16622600  |
| N  | 0.66585200  | 1.23655000  | 0.00748800  |
| C  | 3.01375300  | 0.40030500  | 0.13091600  |
| C  | 2.74411800  | -0.97599400 | 0.14236500  |
| C  | 4.36432200  | 0.78982700  | 0.11957000  |
| C  | 3.77256000  | -1.92261800 | 0.13270600  |
| H  | 1.69857800  | -1.27975300 | 0.14874000  |
| C  | 5.39963200  | -0.14736800 | 0.09502200  |
| H  | 4.54759100  | 1.86040800  | 0.13881700  |
| C  | 5.11101400  | -1.51629900 | 0.10297900  |
| H  | 3.52926900  | -2.98675600 | 0.14871200  |
| H  | 6.43869900  | 0.18739600  | 0.07502600  |
| H  | 5.91483700  | -2.25372700 | 0.09097500  |
| Cu | -0.48013400 | -0.13340400 | -0.46821300 |
| C  | -2.78023400 | -2.12111500 | -0.45151500 |
| C  | -2.55073300 | -2.20288700 | 1.06695500  |
| H  | -3.18385400 | -3.07504800 | -0.84289300 |

|   |             |             |             |
|---|-------------|-------------|-------------|
| H | -3.50571700 | -1.32818700 | -0.64717000 |
| H | -3.09581200 | -3.07318900 | 1.47856900  |
| H | -1.47275800 | -2.40671200 | 1.24486600  |
| N | -1.55369600 | -1.75841600 | -1.19563500 |
| N | -3.01145100 | -0.98834700 | 1.71932600  |
| C | -2.41230900 | -0.78329900 | 3.02316800  |
| H | -1.30457400 | -0.80721100 | 3.01695900  |
| H | -2.72079500 | 0.19349200  | 3.41186900  |
| H | -2.75672000 | -1.55376900 | 3.73579700  |
| C | -1.85726000 | -1.44898400 | -2.60148900 |
| H | -2.41980700 | -0.51220600 | -2.61362100 |
| H | -0.92039600 | -1.30366500 | -3.14701200 |
| H | -2.44677700 | -2.24915200 | -3.09203100 |
| H | -0.90322500 | -2.54052300 | -1.15814300 |
| O | 2.45029000  | 2.67655300  | 0.36414100  |
| H | -2.80589100 | -0.18266700 | 1.09455200  |
| H | -0.35542000 | 2.14275900  | 0.01974500  |
| C | -2.46722400 | 2.16921100  | -0.26056300 |
| O | -2.40800700 | 0.84400300  | -0.38865800 |
| O | -1.33082500 | 2.80974200  | -0.01424600 |
| O | -3.54488200 | 2.79070200  | -0.36647000 |

-----

**Int1-4**

Charge 0

Spin multiplicity 1

| Atomic | Coordinates (Angstroms) |   |   |
|--------|-------------------------|---|---|
| Type   | X                       | Y | Z |

-----

|    |             |             |             |
|----|-------------|-------------|-------------|
| C  | 1.50927800  | 1.85043500  | -0.24510900 |
| N  | 0.21390200  | 1.62043700  | -0.58804700 |
| C  | 2.40922400  | 0.63796800  | -0.10041700 |
| C  | 2.25830700  | -0.53103000 | -0.86053600 |
| C  | 3.48029500  | 0.72089300  | 0.79901800  |
| C  | 3.14206100  | -1.60242000 | -0.70333000 |
| H  | 1.46035200  | -0.58323600 | -1.59530700 |
| C  | 4.35111000  | -0.35458300 | 0.97378900  |
| H  | 3.61376100  | 1.64798100  | 1.34753000  |
| C  | 4.18374400  | -1.52237400 | 0.22423100  |
| H  | 3.02707800  | -2.49410300 | -1.31619500 |
| H  | 5.16866700  | -0.27911500 | 1.68679300  |
| H  | 4.86943900  | -2.35682900 | 0.35005900  |
| Cu | -0.85726800 | 0.16346400  | -0.16830400 |
| C  | -3.06705200 | -1.73939500 | 0.08839800  |
| C  | -3.84018200 | -0.49340000 | 0.51910100  |
| H  | -3.48770800 | -2.63089800 | 0.57767500  |
| H  | -3.16434000 | -1.88737300 | -0.99397700 |

|                                              |             |             |             |
|----------------------------------------------|-------------|-------------|-------------|
| H                                            | -4.91997300 | -0.67388100 | 0.37095900  |
| H                                            | -3.69754100 | -0.32828600 | 1.59582000  |
| N                                            | -1.61982200 | -1.60982000 | 0.38651600  |
| N                                            | -3.34322800 | 0.68764900  | -0.17968500 |
| C                                            | -3.84710000 | 1.95616000  | 0.34942500  |
| H                                            | -3.47433100 | 2.09444500  | 1.36969600  |
| H                                            | -3.46016200 | 2.77663000  | -0.26095800 |
| H                                            | -4.94833000 | 2.02114300  | 0.37141000  |
| C                                            | -0.84402800 | -2.77280300 | -0.10711600 |
| H                                            | -0.90637500 | -2.80372700 | -1.19787100 |
| H                                            | 0.20378600  | -2.65076800 | 0.17353600  |
| H                                            | -1.22995300 | -3.71979400 | 0.29769800  |
| H                                            | -1.51679900 | -1.58658800 | 1.40321100  |
| H                                            | -0.24435000 | 2.52707000  | -0.67389000 |
| O                                            | 1.99605400  | 2.97294300  | -0.05141000 |
| H                                            | -3.57078800 | 0.61875700  | -1.17031300 |
| Sum of electronic and zero-point Energies=   |             |             | -866.588359 |
| Sum of electronic and thermal Energies=      |             |             | -866.570389 |
| Sum of electronic and thermal Enthalpies=    |             |             | -866.569445 |
| Sum of electronic and thermal Free Energies= |             |             | -866.637645 |

---

## Int2-1

Charge -1

Spin multiplicity 1

| Atomic<br>Type | Coordinates (Angstroms) |             |             |
|----------------|-------------------------|-------------|-------------|
|                | X                       | Y           | Z           |
| Cu             | 1.13644000              | -0.55654900 | -0.07316600 |
| C              | -1.94677800             | 0.92686900  | -0.22293200 |
| C              | -0.69816000             | 1.63787800  | 0.31700800  |
| H              | -2.82398000             | 1.39349300  | 0.27767400  |
| H              | -2.04240900             | 1.14066800  | -1.29881900 |
| H              | -0.87704000             | 2.71967900  | 0.12120300  |
| H              | -0.73130000             | 1.55384600  | 1.43739600  |
| N              | -1.94529100             | -0.51791700 | -0.03034500 |
| N              | 0.55430700              | 1.23282700  | -0.26063300 |
| C              | 1.56231100              | 2.22285200  | 0.04705700  |
| H              | 1.77270000              | 2.35942700  | 1.13792200  |
| H              | 2.51585200              | 1.96077300  | -0.42748300 |
| H              | 1.27812300              | 3.23471000  | -0.32457500 |
| C              | -3.25613300             | -1.11889100 | 0.04666300  |
| H              | -3.77330200             | -1.01440700 | -0.91850300 |
| H              | -3.16046700             | -2.19163600 | 0.25306300  |
| H              | -3.92898400             | -0.67764000 | 0.81659100  |
| H              | -1.36020800             | -0.77888100 | 0.75877600  |

|                                              |            |             |             |
|----------------------------------------------|------------|-------------|-------------|
| O                                            | 1.69928500 | -2.28817800 | 0.05301600  |
| H                                            | 2.34942500 | -2.27129200 | 0.77451900  |
| Sum of electronic and zero-point Energies=   |            |             | -541.593194 |
| Sum of electronic and thermal Energies=      |            |             | -541.581359 |
| Sum of electronic and thermal Enthalpies=    |            |             | -541.580415 |
| Sum of electronic and thermal Free Energies= |            |             | -541.632494 |

---

## Int2-2

|                   |                         |   |   |
|-------------------|-------------------------|---|---|
| Charge            | 0                       |   |   |
| Spin multiplicity | 1                       |   |   |
| Atomic            | Coordinates (Angstroms) |   |   |
| Type              | X                       | Y | Z |

---

|                                            |             |             |             |
|--------------------------------------------|-------------|-------------|-------------|
| C                                          | -1.61023200 | -0.24969000 | -0.02975100 |
| N                                          | -0.45000600 | -0.35938100 | -0.03936700 |
| C                                          | -3.02837100 | -0.13023000 | -0.00790500 |
| C                                          | -3.62767100 | 1.11188600  | 0.28267800  |
| C                                          | -3.83235600 | -1.25717300 | -0.27369400 |
| C                                          | -5.01467200 | 1.21716200  | 0.30566700  |
| H                                          | -3.00218700 | 1.97504300  | 0.48635900  |
| C                                          | -5.21786600 | -1.13405800 | -0.24661500 |
| H                                          | -3.36350300 | -2.21014600 | -0.49657500 |
| C                                          | -5.81144500 | 0.09867300  | 0.04206400  |
| H                                          | -5.47608100 | 2.17433900  | 0.53002700  |
| H                                          | -5.83695800 | -2.00255200 | -0.45109700 |
| H                                          | -6.89375200 | 0.18761800  | 0.06169900  |
| Cu                                         | 1.37406400  | -0.54152800 | -0.02697400 |
| C                                          | 3.73194100  | 1.26835800  | -0.33841700 |
| C                                          | 4.15556600  | -0.10639100 | 0.18024000  |
| H                                          | 4.52127600  | 2.01322000  | -0.12699000 |
| H                                          | 3.60549500  | 1.21688900  | -1.42714500 |
| H                                          | 5.09561700  | -0.37627700 | -0.34201900 |
| H                                          | 4.44482800  | -0.00444700 | 1.25412400  |
| N                                          | 2.43622400  | 1.66753300  | 0.23004200  |
| N                                          | 3.13316000  | -1.09616200 | -0.03348300 |
| C                                          | 3.61375800  | -2.43508300 | 0.21363100  |
| H                                          | 3.93544600  | -2.60231800 | 1.26384300  |
| H                                          | 2.83212200  | -3.16988600 | -0.00598600 |
| H                                          | 4.49042100  | -2.68592800 | -0.41762700 |
| C                                          | 1.96655100  | 2.96560800  | -0.24970700 |
| H                                          | 1.77068500  | 2.90207100  | -1.32571100 |
| H                                          | 1.02814500  | 3.22687000  | 0.25094300  |
| H                                          | 2.68863000  | 3.78574400  | -0.08701100 |
| H                                          | 2.52511500  | 1.69577100  | 1.24590300  |
| Sum of electronic and zero-point Energies= |             |             | -790.142725 |

Sum of electronic and thermal Energies= -790.125876  
 Sum of electronic and thermal Enthalpies= -790.124932  
 Sum of electronic and thermal Free Energies= -790.190546

-----  
**Int2TS1**

Charge -1  
 Spin multiplicity 1

Atomic Coordinates (Angstroms)  
 Type X Y Z

-----

|    |             |             |             |
|----|-------------|-------------|-------------|
| C  | -1.42657600 | -0.81591900 | -0.00853500 |
| N  | -0.88446200 | -1.81065700 | 0.42541600  |
| C  | -2.80955000 | -0.28070000 | 0.00732000  |
| C  | -3.74174900 | -0.91593100 | 0.84959900  |
| C  | -3.24968300 | 0.79773100  | -0.77745200 |
| C  | -5.06243700 | -0.48054300 | 0.91404600  |
| H  | -3.39031400 | -1.75652700 | 1.44047100  |
| C  | -4.57710300 | 1.22941000  | -0.71658400 |
| H  | -2.53772200 | 1.27637000  | -1.43985400 |
| C  | -5.48954300 | 0.59772100  | 0.13029400  |
| H  | -5.76494200 | -0.98325400 | 1.57645300  |
| H  | -4.89899000 | 2.06448500  | -1.33641200 |
| H  | -6.52199400 | 0.93804100  | 0.17910900  |
| Cu | 1.24679200  | -0.74635800 | -0.38986500 |
| C  | 3.57900800  | 1.43126600  | -0.08109300 |
| C  | 3.95909600  | -0.00544200 | 0.29376600  |
| H  | 4.44181600  | 2.08531800  | 0.16933200  |
| H  | 3.42626400  | 1.49399700  | -1.16700500 |
| H  | 5.00859300  | -0.14795800 | -0.06266400 |
| H  | 4.05946300  | -0.02406100 | 1.41675900  |
| N  | 2.36313500  | 1.90785300  | 0.58751300  |
| N  | 3.09986200  | -1.02716500 | -0.21799500 |
| C  | 3.59063500  | -2.32233400 | 0.17770600  |
| H  | 3.63655700  | -2.47751000 | 1.28444100  |
| H  | 2.95440600  | -3.11665800 | -0.22850500 |
| H  | 4.62822100  | -2.51133400 | -0.18776100 |
| C  | 2.23512200  | 3.35398700  | 0.58017600  |
| H  | 2.09057100  | 3.70357400  | -0.45034700 |
| H  | 1.35339700  | 3.65529600  | 1.15885300  |
| H  | 3.11587300  | 3.89720800  | 0.98580400  |
| H  | 2.36406000  | 1.55994400  | 1.54456600  |
| H  | -0.35305900 | 1.04072600  | -0.33535600 |
| O  | -0.48278000 | 0.24012800  | -0.87772500 |

Sum of electronic and zero-point Energies= -865.956091  
 Sum of electronic and thermal Energies= -865.937773

Sum of electronic and thermal Enthalpies= -865.936828  
Sum of electronic and thermal Free Energies= -866.006826

---

**Int2-3**

Charge -1

Spin multiplicity 1

Atomic Coordinates (Angstroms)  
Type X Y Z

---

|    |             |             |             |
|----|-------------|-------------|-------------|
| C  | -1.65221000 | -1.65122100 | -0.42735800 |
| N  | -0.41840600 | -1.84125800 | -0.45026200 |
| C  | -2.43968100 | -0.43397500 | -0.03597200 |
| C  | -1.77362800 | 0.77161900  | 0.23877100  |
| C  | -3.84038100 | -0.46376200 | 0.08097700  |
| C  | -2.48689500 | 1.90485500  | 0.62699300  |
| H  | -0.69180700 | 0.80240300  | 0.13384000  |
| C  | -4.55235500 | 0.67234900  | 0.47244900  |
| H  | -4.36196800 | -1.38927200 | -0.13418300 |
| C  | -3.87990300 | 1.86405700  | 0.74909700  |
| H  | -1.95173500 | 2.82933300  | 0.83816900  |
| H  | -5.63669300 | 0.62502200  | 0.56149700  |
| H  | -4.43279100 | 2.75067700  | 1.05437900  |
| Cu | 1.22604200  | -1.11072200 | -0.08045900 |
| C  | 2.92737800  | 1.73462000  | -0.55385400 |
| C  | 3.50574100  | 0.69733000  | 0.41285300  |
| H  | 3.58851100  | 2.62950800  | -0.53495900 |
| H  | 2.96230900  | 1.32788100  | -1.57335100 |
| H  | 4.60912900  | 0.71586100  | 0.25253700  |
| H  | 3.38227800  | 1.11667700  | 1.45059800  |
| N  | 1.54517900  | 2.10035400  | -0.25395900 |
| N  | 3.00821000  | -0.63621600 | 0.26359000  |
| C  | 3.79181400  | -1.53982800 | 1.07030200  |
| H  | 3.73137400  | -1.34817500 | 2.17004200  |
| H  | 3.47192000  | -2.57653900 | 0.91146300  |
| H  | 4.87861000  | -1.49019500 | 0.82424200  |
| C  | 1.07593600  | 3.24741300  | -1.00838400 |
| H  | 1.04604600  | 2.99164700  | -2.07505200 |
| H  | 0.05453200  | 3.50308500  | -0.70422500 |
| H  | 1.70887900  | 4.15574500  | -0.90750300 |
| H  | 1.46223500  | 2.27593600  | 0.74574700  |
| H  | -1.93023000 | -3.40489000 | -0.99697300 |
| O  | -2.55569900 | -2.68558300 | -0.79422200 |

Sum of electronic and zero-point Energies= -865.999304

Sum of electronic and thermal Energies= -865.981199

Sum of electronic and thermal Enthalpies= -865.980255



Sum of electronic and thermal Free Energies= -866.048685

---

**Int2TS2**

Charge -1

Spin multiplicity 1

Atomic Coordinates (Angstroms)  
Type X Y Z

---

|    |             |             |             |
|----|-------------|-------------|-------------|
| C  | -1.65887900 | -1.62067000 | -0.51291500 |
| N  | -0.38883800 | -1.85310900 | -0.55407900 |
| C  | -2.41003600 | -0.43192900 | -0.03142300 |
| C  | -1.75379400 | 0.74730300  | 0.35545000  |
| C  | -3.81117300 | -0.48610700 | 0.04485500  |
| C  | -2.48832700 | 1.83999600  | 0.81704900  |
| H  | -0.67075500 | 0.79905100  | 0.27502200  |
| C  | -4.54232600 | 0.60852200  | 0.50866700  |
| H  | -4.30408100 | -1.40148000 | -0.26516600 |
| C  | -3.88324500 | 1.77688400  | 0.89860200  |
| H  | -1.96843900 | 2.74828400  | 1.11649400  |
| H  | -5.62784700 | 0.55005300  | 0.56522600  |
| H  | -4.45084300 | 2.63216400  | 1.26067000  |
| Cu | 1.23684100  | -1.10884500 | -0.06719000 |
| C  | 2.85020200  | 1.69611200  | -0.66545700 |
| C  | 3.46613400  | 0.77039900  | 0.38684700  |
| H  | 3.50758900  | 2.58657400  | -0.77545000 |
| H  | 2.84154700  | 1.17837500  | -1.63359200 |
| H  | 4.56684300  | 0.78242100  | 0.20366000  |
| H  | 3.35909300  | 1.29224800  | 1.37908000  |
| N  | 1.47951300  | 2.09263300  | -0.34726600 |
| N  | 2.97305500  | -0.57199400 | 0.39069000  |
| C  | 3.72278400  | -1.36533300 | 1.33131000  |
| H  | 3.62847700  | -1.02907000 | 2.39342300  |
| H  | 3.39945000  | -2.41247100 | 1.29995900  |
| H  | 4.81771600  | -1.35411700 | 1.11768900  |
| C  | 0.95026200  | 3.10897800  | -1.23860300 |
| H  | 0.86926900  | 2.69476500  | -2.25110500 |
| H  | -0.05849900 | 3.39579000  | -0.92013300 |
| H  | 1.57044500  | 4.02851000  | -1.30816900 |
| H  | 1.45390200  | 2.42318800  | 0.61599700  |
| H  | -1.11708300 | -2.96657000 | -1.05229200 |
| O  | -2.34761200 | -2.66610700 | -0.98306300 |

Sum of electronic and zero-point Energies= -865.968312

Sum of electronic and thermal Energies= -865.950464

Sum of electronic and thermal Enthalpies= -865.949520

Sum of electronic and thermal Free Energies= -866.017383

---

**Int2-4**

Charge -1

Spin multiplicity 1

Atomic Coordinates (Angstroms)  
Type X Y Z

---

|    |             |             |             |
|----|-------------|-------------|-------------|
| C  | 1.74389100  | -1.49635600 | -0.77121300 |
| N  | 0.44650000  | -1.27222200 | -1.04035200 |
| C  | 2.54380700  | -0.40623700 | -0.06384400 |
| C  | 2.03188900  | 0.83455500  | 0.34006000  |
| C  | 3.89401800  | -0.68302900 | 0.19822800  |
| C  | 2.84552000  | 1.76875300  | 0.98595100  |
| H  | 0.98677500  | 1.06670100  | 0.14647200  |
| C  | 4.70997700  | 0.24614100  | 0.84263200  |
| H  | 4.26962000  | -1.64925400 | -0.12247500 |
| C  | 4.18818100  | 1.48013800  | 1.24081300  |
| H  | 2.42573000  | 2.72589800  | 1.28957300  |
| H  | 5.75508500  | 0.00900100  | 1.03558200  |
| H  | 4.82109400  | 2.20900800  | 1.74418300  |
| Cu | -0.90406500 | 0.01992200  | -0.80036800 |
| C  | -3.85816700 | -0.03430800 | 0.69972800  |
| C  | -3.19100000 | 1.31342800  | 0.41153100  |
| H  | -4.63831300 | 0.12871300  | 1.47639700  |
| H  | -4.37335000 | -0.37927400 | -0.20790600 |
| H  | -4.02352800 | 2.02575400  | 0.21339100  |
| H  | -2.74858200 | 1.67617900  | 1.37953500  |
| N  | -2.91046300 | -1.06687000 | 1.10204900  |
| N  | -2.26471900 | 1.31025600  | -0.68492900 |
| C  | -1.91957600 | 2.66762000  | -1.03854300 |
| H  | -1.39674000 | 3.24066800  | -0.23331200 |
| H  | -1.26236400 | 2.68190400  | -1.91622000 |
| H  | -2.81861500 | 3.27365700  | -1.29330900 |
| C  | -3.53226200 | -2.25779800 | 1.64597800  |
| H  | -4.12194300 | -2.75251200 | 0.86294600  |
| H  | -2.75993700 | -2.96282400 | 1.97395100  |
| H  | -4.21891400 | -2.07150900 | 2.50027700  |
| H  | -2.24000200 | -0.67873600 | 1.76180000  |
| H  | 0.10079400  | -2.11490000 | -1.50003200 |
| O  | 2.35302100  | -2.55022600 | -1.06068500 |

Sum of electronic and zero-point Energies= -866.038481

Sum of electronic and thermal Energies= -866.020509

Sum of electronic and thermal Enthalpies= -866.019565

Sum of electronic and thermal Free Energies= -866.089062

---

**Int1TS3**

Charge 0

| Spin multiplicity | 1                       |             |             |
|-------------------|-------------------------|-------------|-------------|
| Atomic Type       | Coordinates (Angstroms) |             |             |
|                   | X                       | Y           | Z           |
| C                 | 1.91988900              | 1.84178500  | 0.04834000  |
| N                 | 0.67544600              | 1.58412200  | -0.42468900 |
| C                 | 3.04583500              | 1.01851600  | -0.55273300 |
| C                 | 2.90600800              | 0.31781800  | -1.76185100 |
| C                 | 4.28581300              | 0.99450100  | 0.10348100  |
| C                 | 3.97706700              | -0.40746900 | -2.28905200 |
| H                 | 1.95542300              | 0.36571600  | -2.28294800 |
| C                 | 5.35391800              | 0.26432500  | -0.41846500 |
| H                 | 4.38801900              | 1.57480400  | 1.01520100  |
| C                 | 5.20157000              | -0.44078400 | -1.61590400 |
| H                 | 3.86086400              | -0.93667100 | -3.23197000 |
| H                 | 6.30854700              | 0.25206200  | 0.10187000  |
| H                 | 6.03537900              | -1.00383600 | -2.02786000 |
| Cu                | -0.28114900             | -0.09663700 | 0.13621700  |
| C                 | 1.28992900              | -1.75680200 | 2.08802800  |
| C                 | 1.09318300              | -0.43879300 | 2.83311100  |
| H                 | 2.21821600              | -2.24093500 | 2.43202400  |
| H                 | 0.46588200              | -2.44678500 | 2.31386900  |
| H                 | 1.20024700              | -0.61157700 | 3.91744400  |
| H                 | 1.87469500              | 0.27313800  | 2.54383000  |
| N                 | 1.30610700              | -1.53629100 | 0.63194200  |
| N                 | -0.19921500             | 0.17361800  | 2.49017700  |
| C                 | -0.30485000             | 1.55582200  | 2.99043800  |
| H                 | 0.46073900              | 2.16624100  | 2.50177700  |
| H                 | -1.28761500             | 1.95802200  | 2.73076800  |
| H                 | -0.17339100             | 1.62013700  | 4.08298300  |
| C                 | 1.40863300              | -2.78850300 | -0.13020800 |
| H                 | 0.47622000              | -3.35363500 | -0.03498700 |
| H                 | 1.56479900              | -2.55117400 | -1.18499400 |
| H                 | 2.23986900              | -3.42025400 | 0.21799300  |
| H                 | 2.11639000              | -0.95956100 | 0.40029700  |
| H                 | 0.07267200              | 2.31826700  | -0.04423300 |
| O                 | 2.21435100              | 2.69231000  | 0.91329100  |
| H                 | -0.94308200             | -0.39029300 | 2.90179800  |
| C                 | -2.69283500             | 2.43775700  | -2.01466200 |
| C                 | -2.15642600             | 1.16820100  | -1.80524900 |
| C                 | -2.25194100             | 0.59393500  | -0.53003600 |
| C                 | -2.95355200             | 1.23622100  | 0.49899800  |
| C                 | -3.48297300             | 2.50888000  | 0.26902200  |
| C                 | -3.35314100             | 3.11318800  | -0.98296400 |
| H                 | -2.59200400             | 2.89937800  | -2.99321600 |
| H                 | -1.64311500             | 0.65014300  | -2.60695900 |

|                                                           |             |             |             |
|-----------------------------------------------------------|-------------|-------------|-------------|
| H                                                         | -3.08469400 | 0.75478200  | 1.46175100  |
| H                                                         | -4.01069400 | 3.01763100  | 1.07163100  |
| H                                                         | -3.77512100 | 4.09818300  | -1.15943600 |
| I                                                         | -2.25439300 | -1.72889700 | -0.42730200 |
| Sum of electronic and zero-point Energies= -1109.506322   |             |             |             |
| Sum of electronic and thermal Energies= -1109.481545      |             |             |             |
| Sum of electronic and thermal Enthalpies= -1109.480601    |             |             |             |
| Sum of electronic and thermal Free Energies= -1109.564625 |             |             |             |

---

### Int1-5

Charge 0

Spin multiplicity 1

| Atomic Type | Coordinates (Angstroms) |   |   |
|-------------|-------------------------|---|---|
|             | X                       | Y | Z |

---

|    |             |             |             |
|----|-------------|-------------|-------------|
| C  | 2.04091100  | 1.29370500  | 1.16846000  |
| N  | 0.73549900  | 1.37334500  | 0.77708300  |
| C  | 3.06643200  | 1.03476500  | 0.09142000  |
| C  | 2.81390900  | 1.30550000  | -1.26286700 |
| C  | 4.33296400  | 0.56315300  | 0.46970800  |
| C  | 3.80554600  | 1.08957600  | -2.22178700 |
| H  | 1.84808500  | 1.71159500  | -1.54640100 |
| C  | 5.31823100  | 0.33520500  | -0.49020900 |
| H  | 4.52553600  | 0.39799600  | 1.52527800  |
| C  | 5.05597000  | 0.59726300  | -1.83826300 |
| H  | 3.60730100  | 1.31670000  | -3.26615300 |
| H  | 6.29428300  | -0.03519600 | -0.18792500 |
| H  | 5.82715100  | 0.42937800  | -2.58553000 |
| Cu | -0.37090300 | -0.06530000 | 0.04370800  |
| C  | 0.96425300  | -2.60144600 | 0.89353400  |
| C  | 0.75934100  | -2.01712200 | 2.28770900  |
| H  | 1.83704900  | -3.27134200 | 0.89723700  |
| H  | 0.09347300  | -3.19189000 | 0.58826200  |
| H  | 0.74714300  | -2.84076400 | 3.02283800  |
| H  | 1.60908000  | -1.37419900 | 2.54868300  |
| N  | 1.15031400  | -1.53062000 | -0.11240800 |
| N  | -0.44817400 | -1.18909200 | 2.34345700  |
| C  | -0.53509900 | -0.42359300 | 3.59365900  |
| H  | 0.29098900  | 0.29386300  | 3.62728300  |
| H  | -1.47737400 | 0.13138400  | 3.61793300  |
| H  | -0.48378400 | -1.05778100 | 4.49451100  |
| C  | 1.41771700  | -2.07849700 | -1.46062800 |
| H  | 0.52483600  | -2.58549200 | -1.82988900 |
| H  | 1.66706700  | -1.25680100 | -2.13490300 |
| H  | 2.25712000  | -2.78699300 | -1.43607800 |
| H  | 1.97613500  | -0.99266500 | 0.15287700  |

|                                              |             |             |              |
|----------------------------------------------|-------------|-------------|--------------|
| H                                            | 0.19759300  | 1.70874300  | 1.57575100   |
| O                                            | 2.41968400  | 1.48233800  | 2.33492300   |
| H                                            | -1.26812900 | -1.78716100 | 2.24628200   |
| C                                            | -2.54832100 | 3.28526700  | -1.23679900  |
| C                                            | -1.69775700 | 2.17513300  | -1.20799500  |
| C                                            | -1.73948500 | 1.32694100  | -0.10577600  |
| C                                            | -2.61420000 | 1.54524400  | 0.95199400   |
| C                                            | -3.45663200 | 2.66515700  | 0.91242300   |
| C                                            | -3.42476400 | 3.53398600  | -0.17784500  |
| H                                            | -2.51783900 | 3.95543700  | -2.09233700  |
| H                                            | -1.01817800 | 1.99159800  | -2.03403100  |
| H                                            | -2.66726900 | 0.85872100  | 1.79016200   |
| H                                            | -4.14317300 | 2.84226700  | 1.73671700   |
| H                                            | -4.08284100 | 4.39796700  | -0.20651500  |
| I                                            | -2.18232300 | -1.53164600 | -1.01336400  |
| Sum of electronic and zero-point Energies=   |             |             | -1109.515140 |
| Sum of electronic and thermal Energies=      |             |             | -1109.489975 |
| Sum of electronic and thermal Enthalpies=    |             |             | -1109.489031 |
| Sum of electronic and thermal Free Energies= |             |             | -1109.573684 |

---

#### Int1TS4

Charge 0

Spin multiplicity 1

| Atomic Type | Coordinates (Angstroms) |   |   |
|-------------|-------------------------|---|---|
|             | X                       | Y | Z |

---

|    |             |             |             |
|----|-------------|-------------|-------------|
| C  | 2.04752800  | 0.34422100  | 1.72689200  |
| N  | 0.71459000  | 0.64792400  | 1.55657400  |
| C  | 2.99549300  | 0.43145300  | 0.56648000  |
| C  | 2.96966200  | 1.48888900  | -0.35177800 |
| C  | 4.01117400  | -0.53317500 | 0.47226400  |
| C  | 3.92212800  | 1.55951600  | -1.37158900 |
| H  | 2.22472700  | 2.26913300  | -0.24754100 |
| C  | 4.94742100  | -0.47399400 | -0.55906300 |
| H  | 4.06034900  | -1.31467500 | 1.22441900  |
| C  | 4.90282700  | 0.57207700  | -1.48611400 |
| H  | 3.90419500  | 2.39264600  | -2.06922200 |
| H  | 5.72138600  | -1.23330900 | -0.63118900 |
| H  | 5.63953400  | 0.62519200  | -2.28311200 |
| Cu | -0.50026700 | -0.26550400 | 0.33965100  |
| C  | 0.61234500  | -2.56252400 | -1.36838000 |
| C  | 0.82107200  | -2.97197700 | 0.08728400  |
| H  | 1.33627100  | -3.09223800 | -2.00932400 |
| H  | -0.39060400 | -2.86317200 | -1.69337400 |
| H  | 0.81321600  | -4.07060100 | 0.16866700  |
| H  | 1.80190800  | -2.63063200 | 0.44035600  |

|                                              |             |             |              |
|----------------------------------------------|-------------|-------------|--------------|
| N                                            | 0.70413500  | -1.10171800 | -1.52384700  |
| N                                            | -0.20598700 | -2.35573600 | 0.94139500   |
| C                                            | 0.00162900  | -2.60227100 | 2.37863100   |
| H                                            | 0.89649200  | -2.07340600 | 2.71770900   |
| H                                            | -0.86126600 | -2.21869100 | 2.93024200   |
| H                                            | 0.11298800  | -3.67369900 | 2.60335000   |
| C                                            | 0.30586100  | -0.67126100 | -2.87273500  |
| H                                            | -0.77308900 | -0.80973600 | -2.98527200  |
| H                                            | 0.52874300  | 0.39132200  | -2.99785700  |
| H                                            | 0.82620900  | -1.23106300 | -3.66619700  |
| H                                            | 1.67008300  | -0.81909700 | -1.35946300  |
| H                                            | 0.26735700  | 0.67940300  | 2.47078800   |
| O                                            | 2.46790500  | 0.00659400  | 2.83690300   |
| H                                            | -1.12221000 | -2.71722800 | 0.67055600   |
| C                                            | -0.84668600 | 3.66125100  | -0.95044900  |
| C                                            | -0.28095900 | 2.40410700  | -0.70648700  |
| C                                            | -0.64853900 | 1.71832200  | 0.44954500   |
| C                                            | -1.50519900 | 2.28778400  | 1.39423600   |
| C                                            | -2.05565200 | 3.54232700  | 1.13440600   |
| C                                            | -1.72827900 | 4.23544700  | -0.03534100  |
| H                                            | -0.58992600 | 4.18512100  | -1.86776600  |
| H                                            | 0.39159400  | 1.96381600  | -1.43152700  |
| H                                            | -1.77897500 | 1.75352300  | 2.29883300   |
| H                                            | -2.74609200 | 3.97516500  | 1.85332300   |
| H                                            | -2.15532900 | 5.21509800  | -0.22780000  |
| I                                            | -2.94968300 | -0.79189500 | -0.45885600  |
| Sum of electronic and zero-point Energies=   |             |             | -1109.506150 |
| Sum of electronic and thermal Energies=      |             |             | -1109.481457 |
| Sum of electronic and thermal Enthalpies=    |             |             | -1109.480512 |
| Sum of electronic and thermal Free Energies= |             |             | -1109.563855 |

---

### Int1.H<sub>2</sub>O

Charge 0

Spin multiplicity 1

| Atomic<br>Type | Coordinates (Angstroms) |             |             |
|----------------|-------------------------|-------------|-------------|
|                | X                       | Y           | Z           |
| Cu             | -0.22990000             | 0.21213300  | -0.38854800 |
| C              | -3.06756800             | -0.61749700 | -0.23599500 |
| C              | -2.95361300             | 0.75966600  | 0.42188800  |
| H              | -3.86546000             | -1.19421800 | 0.25954800  |
| H              | -3.36582400             | -0.50050800 | -1.28698700 |
| H              | -3.92698400             | 1.27397200  | 0.38547400  |
| H              | -2.68312300             | 0.64593100  | 1.47813300  |
| N              | -1.77174700             | -1.30701300 | -0.21220200 |
| N              | -1.88675100             | 1.55395000  | -0.22162800 |
| C              | -1.61530100             | 2.82766400  | 0.47054500  |

|                                              |             |             |             |
|----------------------------------------------|-------------|-------------|-------------|
| H                                            | -1.21517000 | 2.61422100  | 1.46514100  |
| H                                            | -0.85777200 | 3.38273500  | -0.08719500 |
| H                                            | -2.51790200 | 3.44920300  | 0.57579800  |
| C                                            | -1.72809300 | -2.51125700 | -1.05150300 |
| H                                            | -1.86035700 | -2.23429600 | -2.10248900 |
| H                                            | -0.74709500 | -2.98100100 | -0.94527800 |
| H                                            | -2.50669100 | -3.24418900 | -0.78543300 |
| H                                            | -1.51805800 | -1.56154800 | 0.75033000  |
| I                                            | 2.20921200  | 0.07737700  | -0.09123100 |
| H                                            | -2.17378400 | 1.76337500  | -1.17860400 |
| O                                            | -0.25231600 | -1.58262100 | 2.32229500  |
| H                                            | 0.18136200  | -2.42885600 | 2.51395500  |
| H                                            | 0.45116500  | -1.05669400 | 1.88961700  |
| Sum of electronic and zero-point Energies=   |             |             | -554.212959 |
| Sum of electronic and thermal Energies=      |             |             | -554.198004 |
| Sum of electronic and thermal Enthalpies=    |             |             | -554.197060 |
| Sum of electronic and thermal Free Energies= |             |             | -554.258615 |

-----

### Int2.H<sub>2</sub>O

Charge -1

Spin multiplicity 1

Atomic Coordinates (Angstroms)  
 Type X Y Z

-----

|    |             |             |             |
|----|-------------|-------------|-------------|
| Cu | 0.24239400  | 0.52212200  | -0.12069600 |
| C  | -2.54053500 | -0.76896000 | -1.17650400 |
| C  | -2.49748300 | 0.75993900  | -1.07502300 |
| H  | -3.39413900 | -1.01782300 | -1.84295900 |
| H  | -1.63184300 | -1.12795300 | -1.68463300 |
| H  | -2.37798600 | 1.14004500  | -2.11368600 |
| H  | -3.50598000 | 1.10390500  | -0.75513000 |
| N  | -2.66404200 | -1.43879400 | 0.11304100  |
| N  | -1.49467200 | 1.29704700  | -0.17438400 |
| C  | -1.52458000 | 2.75092800  | -0.23218600 |
| H  | -2.52175400 | 3.15027400  | 0.04728000  |
| H  | -0.79575600 | 3.17474600  | 0.46839800  |
| H  | -1.29704000 | 3.16292100  | -1.23824100 |
| C  | -3.32451900 | -2.72252200 | 0.05609500  |
| H  | -2.71869500 | -3.43562000 | -0.52119800 |
| H  | -3.43282700 | -3.12988500 | 1.06863500  |
| H  | -4.33291600 | -2.70457600 | -0.41398800 |
| H  | -3.06947000 | -0.82154300 | 0.81588100  |
| I  | 2.55163700  | -0.37038200 | 0.04671600  |
| O  | -2.58150900 | 0.62463900  | 2.27643900  |
| H  | -1.95740400 | -0.06133700 | 2.56191300  |
| H  | -2.14460600 | 0.93433500  | 1.41556300  |

Sum of electronic and zero-point Energies= -553.665487  
 Sum of electronic and thermal Energies= -553.651319  
 Sum of electronic and thermal Enthalpies= -553.650374  
 Sum of electronic and thermal Free Energies= -553.710121

-----  
**Int1-1.H<sub>2</sub>O**

Charge 0

Spin multiplicity 1

| Atomic<br>Type | Coordinates (Angstroms) |             |             |
|----------------|-------------------------|-------------|-------------|
|                | X                       | Y           | Z           |
| Cu             | -0.04568100             | 0.88706300  | -0.30506000 |
| C              | 0.68839000              | -2.00635100 | 0.34291900  |
| C              | 1.95366800              | -1.15710100 | 0.21492500  |
| H              | 0.96749700              | -3.07448500 | 0.28276500  |
| H              | 0.24175500              | -1.85481200 | 1.33432100  |
| H              | 2.73965400              | -1.53280300 | 0.88734100  |
| H              | 2.34240200              | -1.21887500 | -0.80876500 |
| N              | -0.29207900             | -1.59683400 | -0.65392900 |
| N              | 1.67474900              | 0.27582100  | 0.49294500  |
| C              | 2.85179300              | 1.13264300  | 0.22317900  |
| H              | 3.05411800              | 1.13651200  | -0.85060600 |
| H              | 2.63059700              | 2.15472500  | 0.53660100  |
| H              | 3.74672600              | 0.77345700  | 0.75275500  |
| C              | -1.64743100             | -2.11052900 | -0.43321700 |
| H              | -2.07701600             | -1.60878500 | 0.43974500  |
| H              | -2.26067500             | -1.84692200 | -1.29947000 |
| H              | -1.68313900             | -3.20535500 | -0.29397000 |
| H              | 0.03319700              | -1.86342600 | -1.58129000 |
| O              | -1.67115600             | 1.58300200  | -0.77021400 |
| H              | -1.63641400             | 2.54779200  | -0.67773900 |
| H              | 1.46183300              | 0.35431100  | 1.48971600  |
| O              | -2.70068900             | 0.46856900  | 1.48492700  |
| H              | -2.38818300             | 0.93160900  | 0.65627900  |
| H              | -3.63004800             | 0.26478300  | 1.30139900  |

Sum of electronic and zero-point Energies= -618.568347  
 Sum of electronic and thermal Energies= -618.554147  
 Sum of electronic and thermal Enthalpies= -618.553203  
 Sum of electronic and thermal Free Energies= -618.609753

-----  
**Int1-2.H<sub>2</sub>O**

Charge 1

Spin multiplicity 1

| Atomic<br>Type | Coordinates (Angstroms) |   |   |
|----------------|-------------------------|---|---|
|                | X                       | Y | Z |



|                                              |             |             |             |
|----------------------------------------------|-------------|-------------|-------------|
| C                                            | 1.94780400  | -0.02633500 | -0.06621400 |
| N                                            | 0.78621800  | -0.01108900 | -0.12619100 |
| C                                            | 3.37034900  | -0.04982500 | 0.00747700  |
| C                                            | 4.08480100  | 1.16158700  | 0.08721400  |
| C                                            | 4.04728900  | -1.28522900 | -0.00155500 |
| C                                            | 5.47352400  | 1.12816400  | 0.15799900  |
| H                                            | 3.55143700  | 2.10663000  | 0.09263100  |
| C                                            | 5.43634400  | -1.29922600 | 0.06969800  |
| H                                            | 3.48512100  | -2.21130400 | -0.06443500 |
| C                                            | 6.14712500  | -0.09742400 | 0.14919300  |
| H                                            | 6.03158000  | 2.05701200  | 0.21954900  |
| H                                            | 5.96576400  | -2.24667000 | 0.06277800  |
| H                                            | 7.23145700  | -0.11604300 | 0.20421300  |
| Cu                                           | -1.07786200 | 0.01796200  | -0.25637300 |
| C                                            | -3.76095500 | 1.11408700  | -0.18233700 |
| C                                            | -3.85444600 | -0.25291000 | -0.85783000 |
| H                                            | -4.56698000 | 1.77099300  | -0.53855700 |
| H                                            | -3.88154300 | 0.99430900  | 0.89992900  |
| H                                            | -4.84705200 | -0.69075300 | -0.68205600 |
| H                                            | -3.73190000 | -0.15350100 | -1.94373300 |
| N                                            | -2.42286200 | 1.70456700  | -0.42037300 |
| N                                            | -2.77697400 | -1.13839900 | -0.35319400 |
| C                                            | -2.70611400 | -2.42022600 | -1.08961000 |
| H                                            | -2.41245200 | -2.23521900 | -2.12654500 |
| H                                            | -1.95326500 | -3.06045900 | -0.62417000 |
| H                                            | -3.67147600 | -2.94476400 | -1.08785700 |
| C                                            | -2.16725800 | 2.90298200  | 0.40719000  |
| H                                            | -2.13546800 | 2.61226200  | 1.46072600  |
| H                                            | -1.19842400 | 3.32804200  | 0.13421500  |
| H                                            | -2.94325700 | 3.67007800  | 0.27902600  |
| H                                            | -2.37323900 | 1.98742100  | -1.40059100 |
| H                                            | -2.99501700 | -1.34469900 | 0.63007500  |
| O                                            | -3.53425000 | -1.26899000 | 2.50679700  |
| H                                            | -4.34540700 | -1.67781100 | 2.84690700  |
| H                                            | -2.89330200 | -1.35391400 | 3.22930500  |
| Sum of electronic and zero-point Energies=   |             |             | -866.990770 |
| Sum of electronic and thermal Energies=      |             |             | -866.970053 |
| Sum of electronic and thermal Enthalpies=    |             |             | -866.969109 |
| Sum of electronic and thermal Free Energies= |             |             | -867.044271 |

---

**Int1TS1.H<sub>2</sub>O**

Charge 0

Spin multiplicity 1

| Atomic | Coordinates (Angstroms) |   |   |
|--------|-------------------------|---|---|
| Type   | X                       | Y | Z |

|                                              |             |             |             |
|----------------------------------------------|-------------|-------------|-------------|
| C                                            | -1.40420300 | -0.23473200 | -0.02292900 |
| N                                            | -0.60445400 | -0.93017500 | -0.61428500 |
| C                                            | -2.87691900 | -0.08302900 | -0.00970800 |
| C                                            | -3.63594400 | -1.09374200 | -0.62565200 |
| C                                            | -3.54247900 | 1.01503800  | 0.55591600  |
| C                                            | -5.02514400 | -1.01360400 | -0.66241400 |
| H                                            | -3.10965700 | -1.93219100 | -1.07087200 |
| C                                            | -4.93561600 | 1.09534800  | 0.51152400  |
| H                                            | -2.95949400 | 1.80724200  | 1.01136800  |
| C                                            | -5.68146000 | 0.08206000  | -0.09239800 |
| H                                            | -5.59893500 | -1.80549900 | -1.13728200 |
| H                                            | -5.43809300 | 1.95443700  | 0.94895800  |
| H                                            | -6.76619800 | 0.14513200  | -0.12212600 |
| Cu                                           | 1.10360900  | 0.18467600  | 0.60249000  |
| C                                            | 3.87857100  | -0.05964300 | -0.12591900 |
| C                                            | 3.25189300  | 0.43841800  | -1.43305700 |
| H                                            | 4.75068400  | -0.69206300 | -0.35787500 |
| H                                            | 4.23911800  | 0.78296200  | 0.47710500  |
| H                                            | 4.02721200  | 0.93617300  | -2.03962700 |
| H                                            | 2.88959300  | -0.42853000 | -1.99464600 |
| N                                            | 2.88102700  | -0.80096500 | 0.67282700  |
| N                                            | 2.10595600  | 1.31878400  | -1.16607000 |
| C                                            | 2.44518200  | 2.73128600  | -0.98385700 |
| H                                            | 1.52685800  | 3.30316600  | -0.82423600 |
| H                                            | 3.06984100  | 2.85127000  | -0.09271100 |
| H                                            | 2.98955500  | 3.16048700  | -1.84251700 |
| C                                            | 3.42062000  | -1.25326900 | 1.96519800  |
| H                                            | 3.64910400  | -0.38762400 | 2.59452400  |
| H                                            | 2.66930000  | -1.86088600 | 2.47563500  |
| H                                            | 4.33966700  | -1.84943000 | 1.84586000  |
| H                                            | -1.06846600 | 0.65157000  | 1.92640000  |
| O                                            | -0.75649300 | 0.87080100  | 1.03024000  |
| H                                            | 1.41624200  | 1.22178900  | -1.90588000 |
| H                                            | 2.58790700  | -1.62201300 | 0.11866400  |
| O                                            | 1.59117700  | -2.50370300 | -1.26362500 |
| H                                            | 1.29142700  | -3.42295700 | -1.20714800 |
| H                                            | 0.76748300  | -1.96371700 | -1.11624100 |
| Sum of electronic and zero-point Energies=   |             |             | -942.939016 |
| Sum of electronic and thermal Energies=      |             |             | -942.918404 |
| Sum of electronic and thermal Enthalpies=    |             |             | -942.917460 |
| Sum of electronic and thermal Free Energies= |             |             | -942.989869 |

-----

**Int1-3.H<sub>2</sub>O**

Charge 0

Spin multiplicity 1

Atomic

Coordinates (Angstroms)

| Type                                         | X           | Y           | Z           |
|----------------------------------------------|-------------|-------------|-------------|
| C                                            | 1.61106700  | 1.27910900  | -0.43425200 |
| N                                            | 0.36692900  | 1.09280800  | -0.52916200 |
| C                                            | 2.69476200  | 0.32313900  | -0.02668300 |
| C                                            | 2.38096800  | -0.93349900 | 0.50963600  |
| C                                            | 4.04928000  | 0.66496000  | -0.17446600 |
| C                                            | 3.38348600  | -1.82697000 | 0.88066100  |
| H                                            | 1.33367600  | -1.20000200 | 0.63151100  |
| C                                            | 5.05479800  | -0.23049800 | 0.19238900  |
| H                                            | 4.30682300  | 1.63535700  | -0.58144300 |
| C                                            | 4.72770700  | -1.47989000 | 0.72155300  |
| H                                            | 3.11660500  | -2.79487300 | 1.29862100  |
| H                                            | 6.09715700  | 0.05126300  | 0.06544500  |
| H                                            | 5.51136900  | -2.17565200 | 1.01071200  |
| Cu                                           | -0.83294200 | -0.27905200 | -0.25123100 |
| C                                            | -3.57135100 | -1.13365300 | -0.34609700 |
| C                                            | -3.78265400 | -0.26659100 | 0.89719300  |
| H                                            | -4.33863000 | -1.92229000 | -0.38440000 |
| H                                            | -3.67278600 | -0.53067100 | -1.25537500 |
| H                                            | -4.80560600 | 0.15314100  | 0.85748800  |
| H                                            | -3.75052000 | -0.90857200 | 1.79051200  |
| N                                            | -2.20977200 | -1.73200800 | -0.36553800 |
| N                                            | -2.73445600 | 0.73112100  | 1.02221800  |
| C                                            | -2.71858000 | 1.43045600  | 2.30352400  |
| H                                            | -2.50332200 | 0.72189300  | 3.11280500  |
| H                                            | -1.92091300 | 2.17773100  | 2.28617900  |
| H                                            | -3.66883000 | 1.94026700  | 2.54210400  |
| C                                            | -2.03094300 | -2.66478100 | -1.50078000 |
| H                                            | -2.09091500 | -2.10387000 | -2.43665500 |
| H                                            | -1.04213700 | -3.12368900 | -1.43829600 |
| H                                            | -2.80066700 | -3.45080200 | -1.50801700 |
| H                                            | -2.09881200 | -2.26746600 | 0.49817100  |
| H                                            | 1.40804100  | 3.06488400  | -0.98693500 |
| O                                            | 2.17025100  | 2.51522900  | -0.73270400 |
| H                                            | -2.76280100 | 1.41463200  | 0.25656300  |
| O                                            | -1.90577100 | 2.62042900  | -1.08678700 |
| H                                            | -2.01670600 | 2.50574100  | -2.04276700 |
| H                                            | -1.01168000 | 2.20610100  | -0.90329300 |
| Sum of electronic and zero-point Energies=   |             |             | -942.967955 |
| Sum of electronic and thermal Energies=      |             |             | -942.947376 |
| Sum of electronic and thermal Enthalpies=    |             |             | -942.946432 |
| Sum of electronic and thermal Free Energies= |             |             | -943.019837 |

**Int1TS2.H<sub>2</sub>O**

Charge 0

Spin multiplicity 1

Atomic Coordinates (Angstroms)  
Type X Y Z

---

|                                              |             |             |             |
|----------------------------------------------|-------------|-------------|-------------|
| C                                            | 1.45860100  | 0.30567600  | -1.27170400 |
| N                                            | 0.20100200  | 0.13320800  | -1.50188700 |
| C                                            | 2.39225400  | -0.37702800 | -0.34568300 |
| C                                            | 1.98328300  | -1.46663200 | 0.43762900  |
| C                                            | 3.71995900  | 0.06937700  | -0.24928400 |
| C                                            | 2.87695800  | -2.08853200 | 1.30689900  |
| H                                            | 0.95993100  | -1.82044800 | 0.34704800  |
| C                                            | 4.61341800  | -0.55207100 | 0.62403300  |
| H                                            | 4.03601600  | 0.89919400  | -0.87243600 |
| C                                            | 4.19457800  | -1.63059000 | 1.40567100  |
| H                                            | 2.54896400  | -2.93418800 | 1.90633800  |
| H                                            | 5.63837000  | -0.19640700 | 0.69069200  |
| H                                            | 4.89089300  | -2.11597700 | 2.08472400  |
| Cu                                           | -1.29464400 | -0.44661700 | -0.60881500 |
| C                                            | -3.93235000 | -0.09169700 | 0.52745800  |
| C                                            | -3.21733800 | 0.88844800  | 1.45965900  |
| H                                            | -4.82389600 | -0.50405100 | 1.02383800  |
| H                                            | -4.27170400 | 0.42448800  | -0.37841900 |
| H                                            | -3.94541800 | 1.64170800  | 1.81091800  |
| H                                            | -2.87308900 | 0.35148800  | 2.35452900  |
| N                                            | -3.02311000 | -1.18579200 | 0.09525300  |
| N                                            | -2.04408800 | 1.45422700  | 0.80680500  |
| C                                            | -1.11673500 | 2.16015800  | 1.69861500  |
| H                                            | -0.69380800 | 1.44226700  | 2.41088400  |
| H                                            | -0.29779100 | 2.57966700  | 1.10502800  |
| H                                            | -1.60078800 | 2.96813900  | 2.27343600  |
| C                                            | -3.69811000 | -2.14140100 | -0.81402600 |
| H                                            | -3.94304800 | -1.63327800 | -1.74975500 |
| H                                            | -3.01805100 | -2.96552300 | -1.03827600 |
| H                                            | -4.62342000 | -2.53947500 | -0.37226000 |
| H                                            | -2.74996500 | -1.70190400 | 0.93423800  |
| H                                            | 0.68768600  | 1.17223000  | -2.31583700 |
| O                                            | 1.92009400  | 1.30467000  | -2.04517800 |
| H                                            | -2.33039900 | 2.08313200  | 0.05830000  |
| O                                            | 1.62611900  | 3.30446400  | -0.05557200 |
| H                                            | 2.25548300  | 2.91407100  | 0.56927800  |
| H                                            | 1.74528400  | 2.74793500  | -0.85743500 |
| Sum of electronic and zero-point Energies=   |             |             | -942.923023 |
| Sum of electronic and thermal Energies=      |             |             | -942.902368 |
| Sum of electronic and thermal Enthalpies=    |             |             | -942.901424 |
| Sum of electronic and thermal Free Energies= |             |             | -942.975559 |

---

**Int1TS2-1.H<sub>2</sub>O**

Charge -2

Spin multiplicity 1

Atomic Coordinates (Angstroms)  
Type x y z

---

|    |             |             |             |
|----|-------------|-------------|-------------|
| C  | 2.16261400  | -0.00969500 | -0.25476000 |
| N  | 1.33475600  | -0.81356000 | 0.30647300  |
| C  | 3.65011300  | -0.20036100 | 0.03741600  |
| C  | 4.08229000  | -1.22125800 | 0.90166900  |
| C  | 4.63127700  | 0.62174300  | -0.54453400 |
| C  | 5.43483500  | -1.41479800 | 1.17664000  |
| H  | 3.30050300  | -1.84102800 | 1.33399000  |
| C  | 5.98974800  | 0.43044300  | -0.27303800 |
| H  | 4.28952100  | 1.40777500  | -1.20969500 |
| C  | 6.40388100  | -0.58853800 | 0.58938200  |
| H  | 5.74321700  | -2.21418700 | 1.85252300  |
| H  | 6.73220900  | 1.08207700  | -0.73700000 |
| H  | 7.46288600  | -0.73854000 | 0.80215100  |
| Cu | -0.48609300 | -0.49178000 | 0.03222700  |
| C  | -3.56703100 | -0.15386100 | 0.09038400  |
| C  | -3.44594600 | 0.04732600  | 1.61371500  |
| H  | -4.55580300 | -0.59401700 | -0.16754000 |
| H  | -3.48637000 | 0.81131600  | -0.42978500 |
| H  | -4.37811700 | -0.26322100 | 2.12167300  |
| H  | -2.65048600 | -0.63029100 | 1.99389300  |
| N  | -2.48458100 | -1.00227100 | -0.45869900 |
| N  | -3.17503500 | 1.44413500  | 1.91906200  |
| C  | -2.72123100 | 1.62832700  | 3.28112500  |
| H  | -1.85371700 | 0.99471700  | 3.56243500  |
| H  | -2.42869600 | 2.67512300  | 3.43155800  |
| H  | -3.53081000 | 1.40333400  | 3.99875400  |
| C  | -2.58711700 | -1.10462300 | -1.92637200 |
| H  | -2.51424600 | -0.09101000 | -2.33478500 |
| H  | -1.76326200 | -1.71539400 | -2.30474200 |
| H  | -3.55520500 | -1.54835300 | -2.25027300 |
| H  | -2.54397100 | -1.93503800 | -0.05102500 |
| H  | 0.87994900  | 1.27700600  | -1.41399400 |
| O  | 1.98471000  | 1.01364500  | -1.09562200 |
| H  | -2.42888400 | 1.73969900  | 1.24965500  |
| C  | -1.24867200 | 1.82203300  | -1.23189400 |
| O  | -1.09174800 | 1.68163300  | 0.06349800  |
| O  | -0.19701100 | 1.62402000  | -2.00083000 |
| O  | -2.38224600 | 2.07855900  | -1.75045700 |
| O  | -4.80523800 | -3.43570800 | -0.49448200 |
| H  | -4.89093500 | -2.58248600 | -0.04018000 |

H            -4.23336600   -3.21160900   -1.24529000  
Sum of electronic and zero-point Energies=        -1206.717939  
Sum of electronic and thermal Energies=         -1206.692553  
Sum of electronic and thermal Enthalpies=       -1206.691608  
Sum of electronic and thermal Free Energies=    -1206.776537

-----  
**Int1-3-1.H<sub>2</sub>O**

Charge    -1

Spin multiplicity    1

| Atomic | Coordinates (Angstroms) |   |   |
|--------|-------------------------|---|---|
| Type   | X                       | Y | Z |

-----

|    |             |             |             |
|----|-------------|-------------|-------------|
| C  | 1.12771600  | -0.33117200 | -0.00052900 |
| N  | 0.62719500  | -1.36951000 | -0.59526600 |
| C  | 2.64457800  | -0.17349800 | -0.00258600 |
| C  | 3.46970200  | -1.11167500 | -0.64354600 |
| C  | 3.25433300  | 0.91516400  | 0.63912600  |
| C  | 4.85652400  | -0.96792400 | -0.64277500 |
| H  | 2.97698300  | -1.94582300 | -1.13431800 |
| C  | 4.64401200  | 1.06282300  | 0.64264400  |
| H  | 2.60450800  | 1.63272000  | 1.12919100  |
| C  | 5.45409400  | 0.12215600  | 0.00186500  |
| H  | 5.47886200  | -1.70716500 | -1.14649900 |
| H  | 5.09749600  | 1.91563600  | 1.14732700  |
| H  | 6.53735900  | 0.23542100  | 0.00289800  |
| Cu | -1.20394200 | -1.19847600 | -0.42651900 |
| C  | -3.65811700 | 0.51914600  | -0.41948600 |
| C  | -2.91762700 | 1.82939500  | -0.12770300 |
| H  | -4.68606900 | 0.62363600  | -0.02673900 |
| H  | -3.72639000 | 0.37097100  | -1.50316700 |
| H  | -3.58563200 | 2.63394000  | -0.47397000 |
| H  | -2.83679500 | 1.95278600  | 0.97259300  |
| N  | -3.03985900 | -0.68474700 | 0.18539000  |
| N  | -1.64812000 | 1.97420900  | -0.81706400 |
| C  | -1.13338800 | 3.33311600  | -0.72725100 |
| H  | -1.07801800 | 3.72983000  | 0.30654900  |
| H  | -0.12126200 | 3.35398500  | -1.14187500 |
| H  | -1.76108900 | 4.02306200  | -1.31227300 |
| C  | -3.99397800 | -1.79967400 | 0.27409500  |
| H  | -4.26875700 | -2.13320800 | -0.73217500 |
| H  | -3.52530500 | -2.63840700 | 0.79580900  |
| H  | -4.91696500 | -1.51329400 | 0.80736500  |
| H  | -2.69539300 | -0.44152300 | 1.13336300  |
| O  | 0.50370000  | 0.66119800  | 0.62959000  |
| H  | -0.93200500 | 1.36342000  | -0.38501900 |
| O  | -1.27432400 | -0.12536900 | 2.40759000  |

|                                              |             |             |             |
|----------------------------------------------|-------------|-------------|-------------|
| H                                            | -0.96585200 | -1.03939900 | 2.51819200  |
| H                                            | -0.57798200 | 0.22579500  | 1.73982700  |
| Sum of electronic and zero-point Energies=   |             |             | -942.413003 |
| Sum of electronic and thermal Energies=      |             |             | -942.393260 |
| Sum of electronic and thermal Enthalpies=    |             |             | -942.392316 |
| Sum of electronic and thermal Free Energies= |             |             | -942.462483 |

---

**Int1TS2-2.H<sub>2</sub>O**

Charge -2

Spin multiplicity 1

Atomic Coordinates (Angstroms)

| Type | x           | y           | z           |
|------|-------------|-------------|-------------|
| C    | -1.94752000 | 1.61284700  | 0.01678000  |
| N    | -0.74060700 | 1.27862200  | 0.43210300  |
| C    | -2.94981300 | 0.49432300  | -0.42067500 |
| C    | -2.59383500 | -0.82071200 | -0.75845700 |
| C    | -4.31264200 | 0.83219200  | -0.50127000 |
| C    | -3.55329600 | -1.76145300 | -1.14802900 |
| H    | -1.53605800 | -1.07695800 | -0.70528200 |
| C    | -5.27950100 | -0.10322900 | -0.87249600 |
| H    | -4.56107600 | 1.86347500  | -0.26773300 |
| C    | -4.90588300 | -1.41149700 | -1.20161000 |
| H    | -3.24361200 | -2.77291800 | -1.41574800 |
| H    | -6.33111000 | 0.18558000  | -0.91235700 |
| H    | -5.65616400 | -2.14397800 | -1.50057400 |
| Cu   | 0.52772400  | -0.10783000 | 0.39209600  |
| C    | 2.66007000  | -2.40310000 | 0.18141000  |
| C    | 3.03199500  | -1.85280400 | -1.20917700 |
| H    | 2.80382700  | -3.50088200 | 0.22321800  |
| H    | 3.34033700  | -1.95683400 | 0.91283300  |
| H    | 3.56712400  | -2.63269800 | -1.78150000 |
| H    | 2.08956600  | -1.65743100 | -1.77020800 |
| N    | 1.28338200  | -2.06870200 | 0.60126700  |

|                                              |             |             |              |
|----------------------------------------------|-------------|-------------|--------------|
| N                                            | 3.87213500  | -0.67782700 | -1.08277600  |
| C                                            | 4.02563400  | 0.06109600  | -2.32309100  |
| H                                            | 3.07402300  | 0.19490100  | -2.87873100  |
| H                                            | 4.39574000  | 1.05951100  | -2.07162200  |
| H                                            | 4.73637300  | -0.43612200 | -3.00878000  |
| C                                            | 1.01640300  | -2.48611300 | 1.98731200   |
| H                                            | 1.68303100  | -1.92311900 | 2.64733700   |
| H                                            | -0.01189900 | -2.22569400 | 2.25418700   |
| H                                            | 1.19945700  | -3.56803600 | 2.14482900   |
| H                                            | 0.63205800  | -2.55582800 | -0.01193000  |
| O                                            | -2.46413600 | 2.76614200  | -0.04299600  |
| H                                            | 3.41640900  | -0.02945300 | -0.39741500  |
| H                                            | 0.27397700  | 2.19612700  | 0.50684200   |
| C                                            | 2.38057500  | 2.17018800  | 0.32440100   |
| O                                            | 2.34923100  | 0.87295400  | 0.62003100   |
| O                                            | 1.25189400  | 2.85320100  | 0.45291000   |
| O                                            | 3.43566900  | 2.72361600  | -0.05697400  |
| O                                            | -1.79563000 | -0.57258100 | 2.59789100   |
| H                                            | -2.43853800 | -0.85206800 | 1.92649500   |
| H                                            | -1.29118600 | 0.09775200  | 2.06372700   |
| Sum of electronic and zero-point Energies=   |             |             | -1206.731594 |
| Sum of electronic and thermal Energies=      |             |             | -1206.706661 |
| Sum of electronic and thermal Enthalpies=    |             |             | -1206.705717 |
| Sum of electronic and thermal Free Energies= |             |             | -1206.789709 |

-----  
**Int1-4.H<sub>2</sub>O**

Charge 0

Spin multiplicity 1

Atomic Coordinates (Angstroms)

| Type | X | Y | Z |
|------|---|---|---|
|------|---|---|---|

|   |            |             |             |
|---|------------|-------------|-------------|
| C | 1.57766700 | -1.76225500 | -0.51223300 |
|---|------------|-------------|-------------|



|                                              |             |             |             |
|----------------------------------------------|-------------|-------------|-------------|
| N                                            | 0.21971400  | -1.70417000 | -0.30357100 |
| C                                            | 2.39657400  | -0.58938100 | -0.01250000 |
| C                                            | 2.01372800  | 0.21582700  | 1.07173300  |
| C                                            | 3.62114800  | -0.33621000 | -0.64518700 |
| C                                            | 2.83202100  | 1.26726000  | 1.49349600  |
| H                                            | 1.09450600  | -0.00104400 | 1.60753200  |
| C                                            | 4.42805700  | 0.72515700  | -0.23674400 |
| H                                            | 3.92240200  | -0.99231500 | -1.45562000 |
| C                                            | 4.03446500  | 1.53291800  | 0.83374100  |
| H                                            | 2.53508800  | 1.87194900  | 2.34758800  |
| H                                            | 5.36918400  | 0.91730400  | -0.74615000 |
| H                                            | 4.66726400  | 2.35451400  | 1.16046800  |
| Cu                                           | -0.81341500 | -0.16477300 | -0.66010600 |
| C                                            | -2.52552100 | 1.92938700  | 0.23354700  |
| C                                            | -3.63347600 | 0.87516400  | 0.27347200  |
| H                                            | -2.97163300 | 2.93047000  | 0.12999600  |
| H                                            | -1.95183800 | 1.91728800  | 1.16684800  |
| H                                            | -4.32692100 | 1.13014900  | 1.09589900  |
| H                                            | -4.22173500 | 0.93660800  | -0.65410200 |
| N                                            | -1.56894800 | 1.67060600  | -0.87520200 |
| N                                            | -3.08258400 | -0.46971400 | 0.36579200  |
| C                                            | -4.06741800 | -1.52964400 | 0.16265100  |
| H                                            | -4.45264600 | -1.48967700 | -0.86312500 |
| H                                            | -3.57910000 | -2.49781900 | 0.30433100  |
| H                                            | -4.92863100 | -1.47171000 | 0.85136600  |
| C                                            | -0.53938600 | 2.73109900  | -0.98328300 |
| H                                            | 0.11079500  | 2.69163100  | -0.10645100 |
| H                                            | 0.07224600  | 2.54694500  | -1.86881400 |
| H                                            | -0.99338800 | 3.73052700  | -1.05282400 |
| H                                            | -2.10246400 | 1.66326900  | -1.74708100 |
| H                                            | -0.16873600 | -2.56892100 | -0.68446300 |
| O                                            | 2.15390400  | -2.70677400 | -1.05842800 |
| H                                            | -2.60545600 | -0.61814100 | 1.25925700  |
| O                                            | -0.97591100 | -1.26240900 | 2.25957900  |
| H                                            | -0.47708700 | -1.52585900 | 1.44016600  |
| H                                            | -0.63118900 | -1.82628000 | 2.96776200  |
| Sum of electronic and zero-point Energies=   |             |             | -942.996741 |
| Sum of electronic and thermal Energies=      |             |             | -942.976077 |
| Sum of electronic and thermal Enthalpies=    |             |             | -942.975133 |
| Sum of electronic and thermal Free Energies= |             |             | -943.048461 |

---

### Int2-1.H<sub>2</sub>O

Charge -1

Spin multiplicity 1

Atomic Coordinates (Angstroms)

| Type                                         | X           | Y           | Z           |
|----------------------------------------------|-------------|-------------|-------------|
| Cu                                           | -1.14887600 | -0.75014800 | 0.08065100  |
| C                                            | 1.94178700  | 0.54935000  | -0.40436900 |
| C                                            | 0.69751100  | 1.12055500  | -1.09291200 |
| H                                            | 2.82263300  | 0.80630900  | -1.03606500 |
| H                                            | 2.06768100  | 1.06485100  | 0.55672200  |
| H                                            | 0.92825400  | 2.19326700  | -1.27972800 |
| H                                            | 0.62039400  | 0.66779300  | -2.11127100 |
| N                                            | 1.85976800  | -0.88268500 | -0.15468800 |
| N                                            | -0.52466800 | 1.00616700  | -0.32346300 |
| C                                            | -1.53905200 | 1.86227000  | -0.91271000 |
| H                                            | -1.80492100 | 1.60337100  | -1.96160000 |
| H                                            | -2.46313900 | 1.81644800  | -0.32506700 |
| H                                            | -1.21488900 | 2.92868500  | -0.93861000 |
| C                                            | 3.11931900  | -1.49132000 | 0.21379900  |
| H                                            | 3.45546000  | -1.08464500 | 1.17702700  |
| H                                            | 2.98561800  | -2.57210900 | 0.33891900  |
| H                                            | 3.94649700  | -1.32568800 | -0.51271600 |
| H                                            | 1.43928800  | -1.36053200 | -0.94780100 |
| O                                            | -1.74333300 | -2.42559400 | 0.48216400  |
| H                                            | -2.63236200 | -2.46533700 | 0.09277400  |
| O                                            | 0.28329300  | 2.56397900  | 1.84574700  |
| H                                            | 0.23422000  | 3.38213900  | 1.32867200  |
| H                                            | -0.05009300 | 1.88315400  | 1.18078900  |
| Sum of electronic and zero-point Energies=   |             |             | -618.001435 |
| Sum of electronic and thermal Energies=      |             |             | -617.986681 |
| Sum of electronic and thermal Enthalpies=    |             |             | -617.985736 |
| Sum of electronic and thermal Free Energies= |             |             | -618.044445 |

## Int2-2.H<sub>2</sub>O

Charge 0

Spin multiplicity 1

Atomic Coordinates (Angstroms)

| Type | X           | Y           | Z           |
|------|-------------|-------------|-------------|
| C    | -1.85735500 | -0.21079700 | -0.14290500 |
| N    | -0.69771900 | -0.28842200 | -0.20896200 |
| C    | -3.27832200 | -0.12837700 | -0.06238700 |
| C    | -3.97423800 | 0.81168800  | -0.84651200 |
| C    | -3.98138600 | -0.98905200 | 0.80259000  |
| C    | -5.36135400 | 0.88384400  | -0.76079700 |
| H    | -3.42392700 | 1.47041000  | -1.51058000 |
| C    | -5.36841000 | -0.90342600 | 0.87667400  |
| H    | -3.43612500 | -1.70992200 | 1.40313800  |

|                                              |             |             |             |
|----------------------------------------------|-------------|-------------|-------------|
| C                                            | -6.05931500 | 0.02970400  | 0.09806000  |
| H                                            | -5.89909600 | 1.60810900  | -1.36535800 |
| H                                            | -5.91151500 | -1.56643000 | 1.54348300  |
| H                                            | -7.14193200 | 0.09127400  | 0.16054400  |
| Cu                                           | 1.13927700  | -0.37872000 | -0.29261500 |
| C                                            | 3.34414500  | 1.45034000  | -0.59519900 |
| C                                            | 3.92935500  | 0.02984500  | -0.67110800 |
| H                                            | 4.15539600  | 2.18002100  | -0.41826500 |
| H                                            | 2.87949200  | 1.71215500  | -1.55635000 |
| H                                            | 4.41692100  | -0.07620300 | -1.65879100 |
| H                                            | 4.75049900  | -0.05582900 | 0.07299400  |
| N                                            | 2.29618800  | 1.52802100  | 0.43011100  |
| N                                            | 2.91643400  | -0.98664400 | -0.44833200 |
| C                                            | 3.35913200  | -2.29173200 | -0.89914400 |
| H                                            | 4.28517000  | -2.61994600 | -0.38471200 |
| H                                            | 2.59128000  | -3.04471000 | -0.69302200 |
| H                                            | 3.57970200  | -2.32759500 | -1.98421500 |
| C                                            | 1.76543500  | 2.87217800  | 0.62741700  |
| H                                            | 1.27192800  | 3.21273400  | -0.29097500 |
| H                                            | 1.02032000  | 2.85653500  | 1.42931000  |
| H                                            | 2.53986800  | 3.61575500  | 0.88649900  |
| H                                            | 2.65213500  | 1.14154700  | 1.31010400  |
| O                                            | 3.11146300  | -0.60625000 | 2.32885700  |
| H                                            | 3.00422400  | -0.91828300 | 1.38047800  |
| H                                            | 4.02449300  | -0.83270800 | 2.56084500  |
| Sum of electronic and zero-point Energies=   |             |             | -866.545921 |
| Sum of electronic and thermal Energies=      |             |             | -866.526399 |
| Sum of electronic and thermal Enthalpies=    |             |             | -866.525455 |
| Sum of electronic and thermal Free Energies= |             |             | -866.596865 |

---

## Int2TS1.H2O

Charge -1

Spin multiplicity 1

| Atomic | Coordinates (Angstroms) |   |   |
|--------|-------------------------|---|---|
| Type   | X                       | Y | Z |

---

|   |             |             |             |
|---|-------------|-------------|-------------|
| C | -1.33609000 | -0.59536900 | 0.13118400  |
| N | -0.72262600 | -1.33737900 | 0.88252800  |
| C | -2.78196300 | -0.26200100 | 0.00173800  |
| C | -3.66616800 | -0.84737800 | 0.92632400  |
| C | -3.31132000 | 0.59275200  | -0.97796300 |
| C | -5.03215500 | -0.58345000 | 0.87697100  |
| H | -3.23891200 | -1.50908200 | 1.67399200  |
| C | -4.68297300 | 0.85559600  | -1.02760800 |
| H | -2.63218700 | 1.03848000  | -1.69494900 |

|                                              |             |             |             |
|----------------------------------------------|-------------|-------------|-------------|
| C                                            | -5.55003900 | 0.27191400  | -0.10235700 |
| H                                            | -5.69836800 | -1.04525900 | 1.60349300  |
| H                                            | -5.07498100 | 1.52042400  | -1.79538900 |
| H                                            | -6.61772300 | 0.47864100  | -0.14260100 |
| Cu                                           | 1.21228500  | -0.80745900 | -0.69550700 |
| C                                            | 2.84187400  | 1.72139000  | -0.46619600 |
| C                                            | 3.73386400  | 0.48014800  | -0.28046700 |
| H                                            | 3.50017200  | 2.60364900  | -0.35065000 |
| H                                            | 2.46990900  | 1.73936000  | -1.50230400 |
| H                                            | 4.46060100  | 0.51442100  | -1.12513400 |
| H                                            | 4.35196000  | 0.63781100  | 0.63339200  |
| N                                            | 1.69318600  | 1.81812400  | 0.45016800  |
| N                                            | 3.03733200  | -0.78538900 | -0.20872100 |
| C                                            | 3.96123700  | -1.88778900 | -0.32818600 |
| H                                            | 4.75246900  | -1.86057000 | 0.45318100  |
| H                                            | 3.43103700  | -2.84086100 | -0.21771100 |
| H                                            | 4.50100300  | -1.92034600 | -1.30221500 |
| C                                            | 1.41643800  | 3.16987600  | 0.90558600  |
| H                                            | 1.09461900  | 3.79980000  | 0.06395300  |
| H                                            | 0.59958700  | 3.14852800  | 1.63584300  |
| H                                            | 2.28362900  | 3.67634100  | 1.37637300  |
| H                                            | 1.79204500  | 1.17707100  | 1.24626600  |
| H                                            | -0.10969000 | 0.95610800  | -0.53249700 |
| O                                            | -0.53915100 | 0.20711000  | -1.01177000 |
| O                                            | 1.80152400  | -0.51642700 | 2.35188300  |
| H                                            | 2.34493700  | -0.74536300 | 1.54896800  |
| H                                            | 0.92315700  | -0.83993400 | 2.05481300  |
| Sum of electronic and zero-point Energies=   |             |             | -942.370552 |
| Sum of electronic and thermal Energies=      |             |             | -942.350697 |
| Sum of electronic and thermal Enthalpies=    |             |             | -942.349753 |
| Sum of electronic and thermal Free Energies= |             |             | -942.420797 |

-----

### Int2-3.H<sub>2</sub>O

|                   |             |                         |             |
|-------------------|-------------|-------------------------|-------------|
| Charge            | -1          |                         |             |
| Spin multiplicity | 1           |                         |             |
| Atomic            |             | Coordinates (Angstroms) |             |
| Type              | X           | Y                       | Z           |
| -----             |             |                         |             |
| C                 | -1.55591900 | 1.23286800              | -0.09223100 |
| N                 | -0.34047800 | 0.89956900              | -0.09834200 |
| C                 | -2.76252600 | 0.34616800              | 0.02920900  |
| C                 | -2.61128800 | -1.04129100             | 0.17653100  |
| C                 | -4.06541000 | 0.87310900              | 0.00260600  |
| C                 | -3.72167900 | -1.87516700             | 0.29203900  |
| H                 | -1.60274800 | -1.44680100             | 0.19766900  |

|                                              |             |             |             |
|----------------------------------------------|-------------|-------------|-------------|
| C                                            | -5.17845000 | 0.03803600  | 0.11763100  |
| H                                            | -4.19134100 | 1.94375500  | -0.10840700 |
| C                                            | -5.01386100 | -1.34096400 | 0.26308600  |
| H                                            | -3.57823800 | -2.94797900 | 0.40573500  |
| H                                            | -6.17861900 | 0.46759800  | 0.09409900  |
| H                                            | -5.88097100 | -1.99245700 | 0.35348300  |
| Cu                                           | 0.82028300  | -0.52753100 | -0.10091400 |
| C                                            | 3.89566500  | -0.06390000 | -0.38204200 |
| C                                            | 3.53643200  | -1.55170000 | -0.31459300 |
| H                                            | 4.95805300  | 0.02689200  | -0.70338400 |
| H                                            | 3.28773200  | 0.41231000  | -1.16308400 |
| H                                            | 3.96350800  | -2.01765300 | -1.23746700 |
| H                                            | 4.14472000  | -2.00034200 | 0.51483300  |
| N                                            | 3.64746200  | 0.63922500  | 0.87058400  |
| N                                            | 2.14048600  | -1.83303900 | -0.17210900 |
| C                                            | 1.90340500  | -3.24861100 | -0.18226400 |
| H                                            | 2.40867000  | -3.78787100 | 0.65534400  |
| H                                            | 0.83179300  | -3.46382700 | -0.09774600 |
| H                                            | 2.26505900  | -3.75431100 | -1.11131400 |
| C                                            | 3.99393400  | 2.05000200  | 0.83292600  |
| H                                            | 3.27636700  | 2.58640900  | 0.20110200  |
| H                                            | 3.91343300  | 2.47254400  | 1.84148100  |
| H                                            | 5.01827200  | 2.26074900  | 0.45386600  |
| H                                            | 4.15328100  | 0.16723000  | 1.61740300  |
| H                                            | -1.13230500 | 3.08222900  | -0.29124500 |
| O                                            | -1.96550500 | 2.56515400  | -0.20318000 |
| O                                            | 0.77343700  | 3.33561400  | -0.50180700 |
| H                                            | 0.87055000  | 3.26276300  | -1.46515700 |
| H                                            | 0.56701500  | 2.36942800  | -0.24913200 |
| Sum of electronic and zero-point Energies=   |             |             | -942.412469 |
| Sum of electronic and thermal Energies=      |             |             | -942.391839 |
| Sum of electronic and thermal Enthalpies=    |             |             | -942.390895 |
| Sum of electronic and thermal Free Energies= |             |             | -942.465311 |

---

### Int2TS2.H<sub>2</sub>O

Charge -1

Spin multiplicity 1

Atomic Coordinates (Angstroms)

| Type | X           | Y           | Z           |
|------|-------------|-------------|-------------|
| C    | -2.02768400 | -1.72267900 | -0.13627600 |
| N    | -0.78466000 | -2.07940600 | -0.17171200 |
| C    | -2.65224900 | -0.38371700 | 0.03433000  |
| C    | -1.88604600 | 0.78411000  | 0.17479100  |
| C    | -4.05304100 | -0.28443400 | 0.05782000  |
| C    | -2.51331400 | 2.01976000  | 0.33624800  |

|                                              |             |             |             |
|----------------------------------------------|-------------|-------------|-------------|
| H                                            | -0.80025500 | 0.72906900  | 0.15625300  |
| C                                            | -4.67694700 | 0.95298100  | 0.21937600  |
| H                                            | -4.63132800 | -1.19560300 | -0.05221100 |
| C                                            | -3.90819300 | 2.11102700  | 0.35957100  |
| H                                            | -1.90435300 | 2.91393800  | 0.44534000  |
| H                                            | -5.76363500 | 1.01339700  | 0.23634700  |
| H                                            | -4.39212700 | 3.07765300  | 0.48677500  |
| Cu                                           | 0.90141400  | -1.33599300 | -0.06605800 |
| C                                            | 2.19749300  | 1.33288700  | -1.37465300 |
| C                                            | 3.18128500  | 0.25591000  | -0.90082500 |
| H                                            | 2.76557100  | 2.00246300  | -2.05548600 |
| H                                            | 1.40872800  | 0.86485500  | -1.98409100 |
| H                                            | 3.54401500  | -0.26563600 | -1.81363200 |
| H                                            | 4.07762300  | 0.77964300  | -0.49425800 |
| N                                            | 1.58057500  | 2.08341100  | -0.28640200 |
| N                                            | 2.66581600  | -0.66520900 | 0.09396900  |
| C                                            | 3.68770500  | -1.65257800 | 0.40230200  |
| H                                            | 4.61611400  | -1.17830000 | 0.79288300  |
| H                                            | 3.32949300  | -2.34478500 | 1.17281600  |
| H                                            | 4.00252500  | -2.26113100 | -0.47173300 |
| C                                            | 1.20669800  | 3.43505500  | -0.63669900 |
| H                                            | 0.40608000  | 3.42561700  | -1.39025300 |
| H                                            | 0.81910000  | 3.95252100  | 0.24914900  |
| H                                            | 2.03336300  | 4.05093400  | -1.05603300 |
| H                                            | 2.14905400  | 2.04629700  | 0.56047600  |
| H                                            | -1.62523600 | -3.20714200 | -0.32648500 |
| O                                            | -2.82135500 | -2.78594600 | -0.28199800 |
| O                                            | 3.01274400  | 1.08661300  | 2.18029900  |
| H                                            | 3.97850000  | 1.10222400  | 2.09817000  |
| H                                            | 2.74829100  | 0.37093800  | 1.50835000  |
| Sum of electronic and zero-point Energies=   |             |             | -942.379620 |
| Sum of electronic and thermal Energies=      |             |             | -942.359371 |
| Sum of electronic and thermal Enthalpies=    |             |             | -942.358427 |
| Sum of electronic and thermal Free Energies= |             |             | -942.431329 |

-----

### Int2-4.H<sub>2</sub>O

Charge -1

Spin multiplicity 1

| Atomic Type | Coordinates (Angstroms) |   |   |
|-------------|-------------------------|---|---|
|             | X                       | Y | Z |

|   |             |             |             |
|---|-------------|-------------|-------------|
| C | -1.54110000 | 1.30623600  | 0.13748900  |
| N | -0.27151500 | 0.91058800  | 0.11591900  |
| C | -2.63946300 | 0.26722400  | 0.02824200  |
| C | -2.40298900 | -1.11058600 | -0.07729400 |
| C | -3.96760900 | 0.71866200  | 0.03456400  |

|                                              |             |             |             |
|----------------------------------------------|-------------|-------------|-------------|
| C                                            | -3.46568500 | -2.01062100 | -0.17476600 |
| H                                            | -1.37725800 | -1.47103200 | -0.08050500 |
| C                                            | -5.03120100 | -0.17814500 | -0.06309700 |
| H                                            | -4.13107700 | 1.78776100  | 0.11873400  |
| C                                            | -4.78456000 | -1.54963600 | -0.16874000 |
| H                                            | -3.26084700 | -3.07629700 | -0.25577000 |
| H                                            | -6.05484000 | 0.19232900  | -0.05688900 |
| H                                            | -5.61209300 | -2.25257500 | -0.24540000 |
| Cu                                           | 0.89176200  | -0.57458300 | -0.00792400 |
| C                                            | 3.98342000  | -0.22044200 | -0.34240100 |
| C                                            | 3.53402900  | -1.58198500 | 0.19937200  |
| H                                            | 5.06398300  | -0.08401800 | -0.12023700 |
| H                                            | 3.87385400  | -0.22286400 | -1.43547600 |
| H                                            | 4.25315000  | -2.33119000 | -0.20300200 |
| H                                            | 3.72987600  | -1.58353800 | 1.30627900  |
| N                                            | 3.17091000  | 0.87495300  | 0.17573500  |
| N                                            | 2.18388400  | -1.92808600 | -0.14861800 |
| C                                            | 1.90136400  | -3.28822000 | 0.23511600  |
| H                                            | 1.96758100  | -3.48486800 | 1.33339100  |
| H                                            | 0.89021000  | -3.57525400 | -0.07810600 |
| H                                            | 2.60544300  | -4.01227500 | -0.23552400 |
| C                                            | 3.55993100  | 2.19801600  | -0.28355300 |
| H                                            | 3.48168700  | 2.23019800  | -1.37787700 |
| H                                            | 2.86808700  | 2.94550900  | 0.12038800  |
| H                                            | 4.59900200  | 2.48887500  | -0.02196900 |
| H                                            | 3.15872900  | 0.84162400  | 1.19337800  |
| H                                            | 0.31445100  | 1.74146400  | 0.20996400  |
| O                                            | -1.91401700 | 2.51469200  | 0.24364900  |
| O                                            | 0.33570300  | 4.07445700  | 0.07316300  |
| H                                            | 0.46219100  | 3.90527800  | -0.87278800 |
| H                                            | -0.52650500 | 3.60538500  | 0.24588000  |
| Sum of electronic and zero-point Energies=   |             |             | -942.446960 |
| Sum of electronic and thermal Energies=      |             |             | -942.426357 |
| Sum of electronic and thermal Enthalpies=    |             |             | -942.425413 |
| Sum of electronic and thermal Free Energies= |             |             | -942.499509 |

-----

**Int1TS3.H<sub>2</sub>O**

Charge 0

Spin multiplicity 1

Atomic Coordinates (Angstroms)

| Type | X | Y | Z |
|------|---|---|---|
|------|---|---|---|

|   |            |            |             |
|---|------------|------------|-------------|
| C | 2.05868700 | 1.90411500 | -0.02525800 |
| N | 0.83418900 | 1.63241800 | -0.54240200 |
| C | 3.19305300 | 1.00765700 | -0.49060200 |
| C | 3.10141800 | 0.21143900 | -1.64359600 |

|                                            |             |             |              |
|--------------------------------------------|-------------|-------------|--------------|
| C                                          | 4.39440200  | 1.01271000  | 0.23385800   |
| C                                          | 4.18243800  | -0.57367100 | -2.05151000  |
| H                                          | 2.18082300  | 0.23332300  | -2.21765300  |
| C                                          | 5.47121000  | 0.22101600  | -0.16662700  |
| H                                          | 4.46102700  | 1.66358200  | 1.10012000   |
| C                                          | 5.36789700  | -0.57548300 | -1.31080900  |
| H                                          | 4.10466900  | -1.17555100 | -2.95402900  |
| H                                          | 6.39539300  | 0.23237500  | 0.40616400   |
| H                                          | 6.20952100  | -1.18560700 | -1.62939300  |
| Cu                                         | -0.17228200 | 0.00099900  | 0.09155200   |
| C                                          | 1.17213300  | -1.60325000 | 2.23734600   |
| C                                          | 0.92111100  | -0.24296400 | 2.88208800   |
| H                                          | 2.05315300  | -2.07891900 | 2.69802200   |
| H                                          | 0.31433300  | -2.26372300 | 2.41559200   |
| H                                          | 0.89012900  | -0.35752800 | 3.97849900   |
| H                                          | 1.75026500  | 0.43738000  | 2.65323600   |
| N                                          | 1.33740300  | -1.45883200 | 0.78032400   |
| N                                          | -0.30996700 | 0.36195800  | 2.35319100   |
| C                                          | -0.44618600 | 1.77188400  | 2.75518600   |
| H                                          | 0.37677900  | 2.35037200  | 2.32431100   |
| H                                          | -1.38909500 | 2.16598900  | 2.36682900   |
| H                                          | -0.43683800 | 1.89759900  | 3.85036700   |
| C                                          | 1.49346800  | -2.74740400 | 0.09428700   |
| H                                          | 0.55239100  | -3.30473900 | 0.14005000   |
| H                                          | 1.73956400  | -2.56579900 | -0.95439800  |
| H                                          | 2.28643500  | -3.36458200 | 0.54351600   |
| H                                          | 2.17483600  | -0.90339700 | 0.59833000   |
| H                                          | 0.23066400  | 2.40204600  | -0.24210900  |
| O                                          | 2.32795200  | 2.82142700  | 0.77580000   |
| H                                          | -1.10984300 | -0.17324000 | 2.69757500   |
| C                                          | -2.58473500 | 2.71908100  | -1.89543300  |
| C                                          | -1.95879200 | 1.47417400  | -1.84562800  |
| C                                          | -2.13363900 | 0.67781400  | -0.70624800  |
| C                                          | -2.99146100 | 1.06807600  | 0.33027700   |
| C                                          | -3.60900600 | 2.32030300  | 0.25803100   |
| C                                          | -3.40895500 | 3.14694500  | -0.84897100  |
| H                                          | -2.42521100 | 3.35547900  | -2.76165400  |
| H                                          | -1.31316700 | 1.14990700  | -2.65295800  |
| H                                          | -3.16071000 | 0.41863500  | 1.18247100   |
| H                                          | -4.25807900 | 2.63854700  | 1.06995400   |
| H                                          | -3.90088800 | 4.11362600  | -0.90370100  |
| I                                          | -1.94782000 | -1.61765600 | -1.01232400  |
| O                                          | -2.55846800 | -1.67097700 | 2.67873000   |
| H                                          | -3.48659500 | -1.77088700 | 2.93995500   |
| H                                          | -2.53442900 | -1.91515800 | 1.73668700   |
| Sum of electronic and zero-point Energies= |             |             | -1185.904389 |



Sum of electronic and thermal Energies= -1185.876116  
 Sum of electronic and thermal Enthalpies= -1185.875172  
 Sum of electronic and thermal Free Energies= -1185.966266

-----  
**Int1-5.H<sub>2</sub>O**

Charge 0

Spin multiplicity 1

Atomic Coordinates (Angstroms)  
 Type X Y Z

-----

|    |             |             |             |
|----|-------------|-------------|-------------|
| C  | 2.33867500  | 0.50174000  | 1.62215600  |
| N  | 1.01011200  | 0.15609600  | 1.60811500  |
| C  | 3.25878800  | 0.00624900  | 0.53337800  |
| C  | 2.83410300  | -0.49659500 | -0.70462000 |
| C  | 4.63649000  | 0.08291200  | 0.78885600  |
| C  | 3.76051400  | -0.91823900 | -1.66124800 |
| H  | 1.77650500  | -0.54479200 | -0.94605500 |
| C  | 5.56260500  | -0.34782500 | -0.15841700 |
| H  | 4.95355000  | 0.48977000  | 1.74290800  |
| C  | 5.12770700  | -0.85025900 | -1.38798000 |
| H  | 3.41106300  | -1.29275500 | -2.61983300 |
| H  | 6.62566900  | -0.28709400 | 0.05931500  |
| H  | 5.84933900  | -1.18039100 | -2.13057800 |
| Cu | -0.31167600 | -0.20684500 | 0.26002100  |
| C  | -1.40465000 | -2.78328300 | 1.32258100  |
| C  | -1.83251100 | -1.91610500 | 2.50114600  |
| H  | -1.26991600 | -3.82079100 | 1.66490300  |
| H  | -2.17365200 | -2.79203900 | 0.54221300  |
| H  | -2.72401200 | -2.36554400 | 2.97115700  |
| H  | -1.03817100 | -1.92850000 | 3.25988900  |
| N  | -0.15250600 | -2.27798900 | 0.71713800  |
| N  | -2.04809000 | -0.52410900 | 2.09818700  |
| C  | -2.17518900 | 0.36232700  | 3.26043600  |
| H  | -1.23828600 | 0.36524500  | 3.82927600  |
| H  | -2.36733300 | 1.38479100  | 2.92542100  |
| H  | -2.98417300 | 0.06208400  | 3.94687600  |
| C  | 0.39909700  | -3.21896100 | -0.27728700 |
| H  | -0.26763300 | -3.26078300 | -1.14143100 |
| H  | 1.37944900  | -2.86750200 | -0.60446800 |
| H  | 0.50412800  | -4.22711500 | 0.14766600  |
| H  | 0.53654200  | -2.13179500 | 1.45795100  |
| H  | 0.56225300  | 0.68190300  | 2.35783400  |
| O  | 2.81201400  | 1.13164300  | 2.57449600  |
| H  | -2.91243900 | -0.45932400 | 1.54983400  |
| C  | 0.57571900  | 3.77969000  | -0.87504500 |
| C  | 0.68274800  | 2.39704400  | -0.68342100 |

|                                              |             |             |              |
|----------------------------------------------|-------------|-------------|--------------|
| C                                            | -0.37444400 | 1.71249200  | -0.09225000  |
| C                                            | -1.53391000 | 2.37774600  | 0.30119000   |
| C                                            | -1.62472500 | 3.76269100  | 0.10957900   |
| C                                            | -0.57154400 | 4.46577500  | -0.47475700  |
| H                                            | 1.40441700  | 4.31500000  | -1.33152800  |
| H                                            | 1.58766300  | 1.88530700  | -0.99097200  |
| H                                            | -2.37901600 | 1.83579300  | 0.70985100   |
| H                                            | -2.53176300 | 4.28197200  | 0.41032400   |
| H                                            | -0.64561200 | 5.53974100  | -0.62124000  |
| I                                            | -1.60926800 | -0.58570000 | -1.94303600  |
| O                                            | -4.40809700 | -0.14211600 | 0.28585000   |
| H                                            | -3.84230600 | -0.30014000 | -0.49577800  |
| H                                            | -4.74124900 | 0.75894600  | 0.15414500   |
| Sum of electronic and zero-point Energies=   |             |             | -1185.917436 |
| Sum of electronic and thermal Energies=      |             |             | -1185.889169 |
| Sum of electronic and thermal Enthalpies=    |             |             | -1185.888225 |
| Sum of electronic and thermal Free Energies= |             |             | -1185.978832 |

-----

### Int1TS4.H<sub>2</sub>O

Charge 0

Spin multiplicity 1

Atomic Coordinates (Angstroms)

| Atomic Type | X           | Y           | Z           |
|-------------|-------------|-------------|-------------|
| C           | 2.00068900  | 0.37472400  | 1.81129100  |
| N           | 0.68260900  | 0.61741100  | 1.51594500  |
| C           | 3.03997600  | 0.40686100  | 0.72472300  |
| C           | 3.09521100  | 1.40770000  | -0.25297800 |
| C           | 4.05171200  | -0.56544100 | 0.76320500  |
| C           | 4.11984300  | 1.41021000  | -1.20441300 |
| H           | 2.35809800  | 2.20168500  | -0.24512800 |
| C           | 5.06147800  | -0.57515600 | -0.19800400 |
| H           | 4.03838400  | -1.29968500 | 1.56275500  |
| C           | 5.09493800  | 0.41063900  | -1.18921900 |
| H           | 4.16348800  | 2.20228700  | -1.94762200 |
| H           | 5.83107900  | -1.34176000 | -0.16631400 |
| H           | 5.88780900  | 0.41062000  | -1.93236500 |
| Cu          | -0.37661100 | -0.23352200 | 0.14157100  |
| C           | 0.76464500  | -2.32590200 | -1.78761000 |
| C           | 1.04803300  | -2.83047600 | -0.37593200 |
| H           | 1.50500100  | -2.74491300 | -2.48830200 |
| H           | -0.22222500 | -2.67803600 | -2.11080900 |
| H           | 1.09880400  | -3.93095700 | -0.37985000 |
| H           | 2.02105800  | -2.46313700 | -0.02907000 |
| N           | 0.73747200  | -0.85327700 | -1.83141500 |
| N           | 0.02002400  | -2.33649200 | 0.55365100  |

|                                              |             |             |              |
|----------------------------------------------|-------------|-------------|--------------|
| C                                            | 0.27425600  | -2.69845100 | 1.96131800   |
| H                                            | 1.17956500  | -2.19747900 | 2.31181400   |
| H                                            | -0.56135600 | -2.34835000 | 2.57102600   |
| H                                            | 0.39569500  | -3.78484000 | 2.08619300   |
| C                                            | 0.24610900  | -0.36588300 | -3.13046700  |
| H                                            | -0.81275300 | -0.62139300 | -3.22704800  |
| H                                            | 0.33380300  | 0.72180200  | -3.17526400  |
| H                                            | 0.79881600  | -0.79891300 | -3.97899000  |
| H                                            | 1.68564700  | -0.50543800 | -1.68368300  |
| H                                            | 0.11948400  | 0.60298800  | 2.36663600   |
| O                                            | 2.34121600  | 0.10752000  | 2.96687200   |
| H                                            | -0.88497500 | -2.71905400 | 0.27429000   |
| C                                            | -0.62209300 | 3.71985400  | -1.10488100  |
| C                                            | -0.09792000 | 2.44876900  | -0.83570900  |
| C                                            | -0.57791300 | 1.74430100  | 0.26587900   |
| C                                            | -1.50557000 | 2.30668200  | 1.14473100   |
| C                                            | -2.01323100 | 3.57433500  | 0.86029900   |
| C                                            | -1.57548600 | 4.28657800  | -0.26119000  |
| H                                            | -0.27229200 | 4.25991400  | -1.98124000  |
| H                                            | 0.64175500  | 2.02134200  | -1.49924600  |
| H                                            | -1.85262200 | 1.75348300  | 2.01122900   |
| H                                            | -2.75528600 | 4.00642500  | 1.52671900   |
| H                                            | -1.96988100 | 5.27703100  | -0.46849400  |
| I                                            | -2.88806400 | -0.83300500 | -0.59529500  |
| O                                            | -2.08127200 | -0.42593600 | 2.97345900   |
| H                                            | -2.81415000 | -0.33703800 | 3.60197100   |
| H                                            | -2.51216800 | -0.58738200 | 2.10967900   |
| Sum of electronic and zero-point Energies=   |             |             | -1185.907325 |
| Sum of electronic and thermal Energies=      |             |             | -1185.879196 |
| Sum of electronic and thermal Enthalpies=    |             |             | -1185.878252 |
| Sum of electronic and thermal Free Energies= |             |             | -1185.968843 |

---

## 2. Full citation for reference 15

M. J. Frisch, G. W. Trucks, H. B. Schlegel, G. E. Scuseria, M. A. Robb, J. R. Cheeseman, G. Scalmani, V. Barone, B. Mennucci, G. A. Petersson, H. Nakatsuji, M. Caricato, X. Li, H. P. Hratchian, A. F. Izmaylov, J. Bloino, G. Zheng, J. L. Sonnenberg, M. Hada, M. Ehara, K. Toyota, R. Fukuda, J. Hasegawa, M. Ishida, T. Nakajima, Y. Honda, O. Kitao, H. Nakai, T. Vreven, J. A. Montgomery Jr., J. E. Peralta, F. Ogliaro, M. Bearpark, J. J. Heyd, E. Brothers, K. N. Kudin, V. N. Staroverov, R. Kobayashi, J. Normand, K. Raghavachari, A. Rendell, J. C. Burant, S. S. Iyengar, J. Tomasi, M. Cossi, N. Rega, J. M. Millam, M. Klene, J. E. Knox, J. B. Cross, V. Bakken, C. Adamo, J. Jaramillo, R. Gomperts, R. E. Stratmann, O. Yazyev, A. J.

Austin, R. Cammi, C. Pomelli, J. W. Ochterski, R. L. Martin, K. Morokuma, V. G. Zakrzewski, G. A. Voth, P. Salvador, J. J. Dannenberg, S. Dapprich, A. D. Daniels, Ö. Farkas, J. B. Foresman, J. V. Ortiz, J. Cioslowski and D. J. Fox, Gaussian 09, Revision D.01, Gaussian, Inc., Wallingford CT, 2009.
